# 1 **cAMP prevents antibody-mediated thrombus formation in COVID-19**

2

3 Jan Zlamal<sup>1\*</sup>, Karina Althaus<sup>1,2\*</sup>, Hisham Jaffal<sup>1</sup>, Lisann Pelzl<sup>1</sup>, Anurag Singh<sup>1</sup>, Andreas

4 Witzemann<sup>1</sup>, Helene Häberle<sup>3</sup>, Valbona Mirakaj<sup>3</sup>, Peter Rosenberger<sup>3</sup> and Tamam

5 Bakchoul<sup>1,2</sup>

6

7 <sup>1</sup>Institute for Clinical and Experimental Transfusion Medicine, Medical Faculty of Tuebingen,  
8 University Hospital of Tuebingen

9 <sup>2</sup>Centre for Clinical Transfusion Medicine, University Hospital of Tuebingen

10 <sup>3</sup>Department of Anesthesiology and Intensive Care Medicine, University Hospital of  
11 Tuebingen

12 \* Indicates equal contribution

13

14 Running title: cAMP prevents antibody-induced procoagulant platelets

15 Tables: 1

16 Figures: 10

17

18 **Key words:** procoagulant platelet, Fc-gamma-receptor IIA, COVID-19, cAMP

19

## 20 **Corresponding author:**

21 Tamam Bakchoul , MD

22 University Hospital of Tuebingen

23 Otfried-Müller-Straße 4/1

24 72076 Tübingen

25 Tel: +49-(0)7071 / 29-81601, Fax: +49-(0)7071 / 29-5240

26 E-mail: [tamam.bakchoul@med.uni-tuebingen.de](mailto:tamam.bakchoul@med.uni-tuebingen.de)

27

28

29

30 **Key points**

- 31 - Fc-gamma-receptor IIA mediated PS externalization on the PLT surface  
32 triggers increased thrombus formation  
33 - Inductors of cAMP inhibit antibody-mediated thrombus formation and may  
34 have potential therapeutic advantage in COVID-19  
35

36 **Abstract**

37 Thromboembolic events are frequently reported in patients infected with the SARS-  
38 CoV-2 virus. However, the exact mechanisms of thromboembolic events remain  
39 elusive. In this work, we show that immunoglobulin G (IgG) subclass in patients with  
40 COVID-19 trigger the formation of procoagulant PLTs in a Fc-gamma-RIIA (FcγRIIA)  
41 dependent pathway leading to increased thrombus formation in vitro. Most  
42 importantly, these events were significantly inhibited via FcγRIIA blockade as well as  
43 by the elevation of PLTs' intracellular cyclic-adenosine-monophosphate (cAMP)  
44 levels by the clinical used agent Iloprost. The novel findings of FcγRIIA mediated  
45 prothrombotic conditions in terms of procoagulant PLTs leading to higher thrombus  
46 formation as well as the successful inhibition of these events via Iloprost could be  
47 promising for the future treatment of the complex coagulopathy observed in COVID-  
48 19 disease.  
49

## 50 **Introduction**

51 Infection with SARS-CoV-2 has been shown to be associated with abnormalities in  
52 the coagulation system with an increased incidence of thromboembolic events in  
53 small vessels leading to higher mortality (1-3). Accumulating evidence suggests  
54 upregulated release of inflammatory cytokines and increased interaction between  
55 different actors of innate and adaptive immunity as the main causes for the  
56 prothrombotic environment observed in COVID-19 disease (4). Moreover, a  
57 significant number of reports described platelet (PLT) hyperactivity in patients with  
58 COVID-19, which is assumed to contribute to prothrombotic conditions (5, 6).  
59 Procoagulant PLTs, predominantly generated at the outer side of the growing  
60 thrombus, are increasingly recognized to link primary with secondary haemostasis (7-  
61 10). The latter is mainly executed by negatively charged membrane phospholipids  
62 externalized on the PLT surface. This unique feature of procoagulant PLTs enables  
63 the assembly of tenase as well as prothrombinase complexes leading to high  
64 thrombin burst, increased fibrin deposition and thrombus formation (11). Recently, we  
65 showed that PLTs from patients with severe COVID-19 infection express a  
66 procoagulant phenotype. Immunoglobulin G (IgG) fractions were found to be  
67 responsible for the COVID-19 induced procoagulant PLTs (Althaus et al. accepted).

68 In the current study, we investigate the time course of the generation of  
69 antibody- induced procoagulant PLTs as well as the mechanisms leading to  
70 alterations in the PLT phenotype in COVID-19. We observed that IgG fractions from  
71 severe COVID-19 patients induce increased thrombus formation in an Fc-gamma  
72 RIIA (FcγRIIA) dependent manner. More importantly, we were able to show that  
73 cyclic-adenosine-monophosphate (cAMP) elevation in PLTs prevents COVID-19  
74 antibody-induced procoagulant PLT generation as well as clot formation.

## 75 **Materials and Methods**

### 76 ***Patients and sera***

77 Experiments were performed using leftover serum material from COVID-19 patients  
78 who were referred to our laboratory between March and June 2020. The diagnosis of  
79 SARS-CoV-2 infection was confirmed by real time PCR on material collected by  
80 nasal swabs. Sera from ICU non-Covid-19 patients with postoperative sepsis were  
81 collected to serve as ICU control group. Additionally, sera were collected from  
82 healthy blood donors at the Blood Donation Centre Tuebingen after written  
83 consensus was obtained to establish cutoff values when appropriate. Serum samples  
84 were stored at -80°C and thawed at room temperature prior to the performed  
85 experimental procedure. All sera were heat-inactivated at 56°C for 30 minutes (min),  
86 which was followed by a centrifugation step at 5000xg. The spun-down was  
87 discarded and supernatants were handled as described in the following sections.

### 88 ***IgG preparation***

89 IgG fractions were isolated by the use of a commercially available IgG-purification-kit  
90 (Melon<sup>TM</sup>-Gel IgG Spin Purification Kit, Thermo Fisher Scientific, Waltham, USA) and  
91 used as recommended by the manufacturer. In brief, heat inactivated serum was  
92 diluted 1:10 in purification buffer and incubated with the kit specific Gel IgG  
93 Purification Support over four cycles for 10 min. Subsequently, periodically performed  
94 centrifugation steps through a 10 µm pore size filter tube were performed for 1 min at  
95 5000xg. The flow throw was collected into 100 kDa-pore sized centrifugal filters  
96 (Amicon Ultra-4, Merck Millipore, Cork, Ireland) with subsequent concentration to the  
97 initial volume of the used serum sample via centrifugation (10-15 min, 2000xg, 4°C,  
98 with brake). Afterwards, IgG concentrations were measured at a mass extinction

99 coefficient of 13.7 at 280 nm wavelength using a NanoDrop One spectrophotometer  
100 (VWR, Bruchsal, Germany). IgG purity was verified using Coomassie staining  
101 (Abcam, Cambridge, UK).

## 102 ***Preparation of washed platelets***

103 Washed platelets (wPLTs) were prepared from venous blood samples as described  
104 previously (12). Briefly, whole blood from healthy donors was withdrawn by cubital  
105 venipuncture into acidic-dextrose containing vacutainers (Becton-Dickinson,  
106 Plymouth, UK) and allowed to rest for 45 min at 37°C. After centrifugation (20 min,  
107 120xg, room temperature [RT], no brake) PLT-rich-plasma (PRP) was gently  
108 separated and supplemented with apyrase (5 µL/mL, Sigma-Aldrich, St. Louis, USA)  
109 and prewarmed ACD-A (111 µL/mL, Terumo BCT, Inc., Lakewood, USA). After an  
110 additional centrifugation step (7 min, 650xg, RT, no brake), the PLT pellet was  
111 resuspended in 5 mL of wash-solution (modified Tyrode buffer: 5 mL bicarbonate  
112 buffer, 20 percent (%) bovine serum albumin, 10% glucose solution [Braun,  
113 Melsungen, Germany], 2.5 U/mL apyrase, 1 U/mL hirudin [Pentapharm, Basel,  
114 Swiss], pH 6.3) and allowed to rest for 15 min at 37°C. Following final centrifugation  
115 (7 min, 650xg, RT, no brake) wPLTs were resuspended in 2 mL of resuspension-  
116 buffer (50 mL of modified Tyrode buffer, 0.5 mL of 0.1 M MgCl<sub>2</sub>, 1 mL of 0.2 M  
117 CaCl<sub>2</sub>, pH 7.2) and adjusted to 300x10<sup>9</sup> PLTs/L after the measurement at a Cell-Dyn  
118 Ruby hematological analyzer (Abott, Wiesbaden, Germany) was performed. For  
119 calcium chelation experiments, the PLT pellet was resuspended with resuspension-  
120 buffer without the supplementation of calcium (50 mL of modified Tyrode buffer, 0.5  
121 mL of 0.1 M MgCl<sub>2</sub>, pH 7.2).

## 122 ***Treatment of wPLTs with ICU COVID-19 sera/IgG***

123 wPLTs ( $7.5 \times 10^6$ ) were supplemented with 5  $\mu$ L serum/IgG from ICU COVID-19  
124 patients or control serum/IgG and incubated for 1.5 hours (hs) at RT under rotating  
125 conditions. Afterwards, samples were washed once (7 min, 650xg, RT, no brake),  
126 resuspended in 100  $\mu$ L of phosphate buffered saline (PBS, [Biochrom, Berlin,  
127 Germany]) and further handled as described in the following sections.

### 128 ***Detection of phosphatidylserine exposure***

129 To assess externalization of phosphatidylserine (PS) on the PLT surface after  
130 antibody treatment, 10  $\mu$ L of PLT suspension were transferred into 100  $\mu$ L of Hank's  
131 balanced salt solution (HBSS), (137 mM NaCl, 1.25 mM CaCl<sub>2</sub>, 5.5 mM glucose,  
132 [Carl-Roth, Karlsruhe, Germany]) and incubated with 1  $\mu$ L Annexin V-FITC  
133 (Immunotools, Friesoythe, Germany) for 30 min at RT in the dark. To induce the  
134 maximal externalization of PS on the PLT surface, wPLTs were incubated with  
135 ionomycin (Sigma-Aldrich, St. Louis, USA, [5  $\mu$ M, 15 min at RT]). Afterwards, PLTs  
136 were filled up with HBSS to a final volume of 500  $\mu$ L and acquired at a flow cytometer  
137 ([FC], Navios, Beckman-Coulter, Brea, USA).

138 PLTs were gated based on their characteristic forward scatter (FSC) vs. side  
139 scatter (SSC) properties as well as CD41a and CD42a expression (anti-CD41a-PC5  
140 and anti-CD42a-PerCP, both BD, San Jose, USA), respectively. Test results were  
141 analyzed as fold increase of the percentage PS positive PLTs compared to PLTs that  
142 were incubated with serum/IgG from healthy individuals.

### 143 ***Determination of changes in the inner-mitochondrial-transmembrane potential*** 144 ***( $\Delta\Psi$ )***

145 Changes of the mitochondrial inner transmembrane potential ( $\Delta\Psi$ ) induced by ICU  
146 COVID-19 sera/IgG were analyzed by FC, as previously reported (13). Briefly, after

147 treatment with IgG/serum from ICU COVID-19 patients, wPLTs ( $\sim 2 \times 10^6$ ) were  
148 incubated with a final concentration of 10  $\mu\text{M}$  tetramethylrhodamine, ethyl ester  
149 (TMRE, Abcam, Cambridge, UK) for 30 min at RT in the dark. Carbonyl cyanide 4-  
150 (trifluoromethoxy) phenylhydrazone (FCCP, Abcam, Cambridge, UK) which is an  
151 uncoupler of mitochondrial oxidative phosphorylation served as positive control in  
152 each experiment. After staining with TMRE, PLTs were filled up with PBS to a final  
153 volume of 500  $\mu\text{L}$  and immediately analyzed by FC. Changes in the  $\Delta\Psi$  were  
154 determined in gated PLTs as percentage of TMRE negative events and normalized to  
155 PLTs that were treated with serum/IgG from healthy controls.

### 156 ***Phenotyping of different PLT-populations***

157 ICU COVID-19 serum/IgG-mediated procoagulant changes (PS/CD62p-double  
158 positive) were assessed in some experiments using a triple staining. Briefly, 10  $\mu\text{L}$   
159 ( $\sim 1 \times 10^6$ ) of the resuspended PLT suspension were transferred into 10  $\mu\text{L}$  of HBSS  
160 and incubated with 1  $\mu\text{L}$  anti-CD62p-APC (BD, San Jose, USA), 1  $\mu\text{L}$  Annexin-FITC  
161 (Immunotools, Friesoythe, Germany) and 1  $\mu\text{L}$  anti-CD42a-PerCP (BD, San Jose,  
162 USA) for 15 min at RT in the dark. PLTs treated with thrombin receptor activating  
163 peptide (TRAP-6, [20  $\mu\text{M}$ , 30 min at RT]) and ionomycin (5  $\mu\text{M}$ , 15 min at RT, [both  
164 Sigma-Aldrich, St. Louis, USA]) served as positive controls. Afterwards, PLTs were  
165 resuspended with HBSS to a final volume of 500  $\mu\text{L}$  and immediately assessed via  
166 FC. In selected experiments that were designed to investigate the impact of calcium  
167 on cell signalling, PLT PS externalization was assessed by the use of the calcium  
168 independent marker lactadherin. 1  $\mu\text{L}$  of lactadherin-FITC (Haematologic  
169 Technologies, Essex Junction, USA) was incubated with wPLTs as for Annexin-FITC  
170 for 15 min at RT, in the dark, and the PLT suspension filled up to final volume of 500  
171  $\mu\text{L}$  with PBS prior to FC analysis.



172 ***Western blot analysis of caspase 3 cleavage***

173 Protein levels of cleaved-caspase 3 were determined by western blot. After  
174 serum/IgG incubation, cells were washed with PBS for 7 min, 700xg at 4°C.  
175 Subsequently, the pellet was resuspended in 100 µL of ice-cold RIPA lysis buffer  
176 containing HALT™ protease and phosphatase inhibitor-cocktail (both ThermoFisher  
177 Scientific, Paisley, UK). Protein concentrations were determined using the NanoDrop  
178 One spectrophotometer (VWR, Bruchsal, Germany). 100 µg of protein was  
179 solubilized in sample buffer (Invitrogen™, Carlsbad, USA) at 95°C for 10 min.  
180 Proteins were separated by electrophoresis using 12% SDS-PAGE gels in glycine-  
181 tris buffer. Thereafter, probes were transferred to polyvinylidene difluoride (PVDF)  
182 membranes (0.45 µm, Merck, Tullagreen, Ireland). Afterwards, membranes were  
183 blocked with 5% milk in tris-buffered saline (TBS-T, 20 mM Tris, 140 mM NaCl, 0.1%  
184 Tween, pH 7.6) at RT for 1 h. Membranes were then incubated with primary anti-  
185 human cleaved-caspase 3 antibody (1:1000, Abcam, Cambridge, UK) and anti-  
186 human alpha-tubulin (1:1000, Cell Signaling Technology, Danvers, USA) at 4°C  
187 overnight. After washing with TBS-T buffer, the membranes were incubated with the  
188 appropriate secondary anti-rabbit or anti-mouse antibody conjugated with IRDye®680  
189 / IRDye®800 (1:3000, LI-COR®, Lincoln, USA) for 1 h at RT. Protein bands were  
190 detected after additional washes (TBS-T) with Odyssey infrared imaging system (LI-  
191 COR®, Lincoln, USA). Western blots were analyzed by ImageJ software (NIH,  
192 Bethesda, USA). The results are shown as the ratio of total cleaved-caspase 3 to  
193 procaspase 3 (full fragment) and normalized to wPLTs that were treated with healthy  
194 control serum/IgG.

195 ***Assessment of the mechanisms of antibody-mediated effects on PLTs***

196 75  $\mu$ L wPLTs were pretreated with the Fc $\gamma$ R1IA blocking monoclonal antibody (moAb)  
197 anti-CD32 (5  $\mu$ L moAb IV.3; stemcell™ technologies, Vancouver, Canada) for 45 min  
198 at 37°C prior to serum/IgG treatment. A monoclonal isotype (moAb) served as  
199 vehicle control ([SC-2025], Santa Cruz Biotechnology, Dallas, USA).

200 For the chelation of extracellular calcium, the non-membrane permeable  
201 chelator of extracellular calcium EGTA (Ethyleneglycol-bis(2-aminoethylether)-  
202 N,N,N',N'-tetraacetic acid, 1 mM, 5 min at 37°C [Sigma Aldrich, St. Louis, USA]) was  
203 used.

204 For the depletion of calcium in the inner compartment of PLTs, the intracellular  
205 chelator of calcium BAPTA-AM (1,2-Bis(2-aminophenoxy)ethane-N,N,N',N'-  
206 tetraacetic acid tetrakis(acetoxymethyl) ester, 20  $\mu$ M, 15 min at 37°C, [Selleck,  
207 Houston, USA]) was used.

208 To investigate the effect of increased intracellular levels of cAMP, wPLTs were  
209 pretreated with the adenylate cyclase (ADC) inducers Forskolin (2.25  $\mu$ M) and  
210 Iloprost (20 nM, both Sigma-Aldrich, St. Louis, USA) prior to the incubation with  
211 sera/IgGs from ICU COVID-19 patients.

## 212 ***Investigations of antibody-mediated thrombus formation***

213 To assess the impact of ICU COVID-19 IgG-induced effects on clot formation, an ex  
214 vivo model for thrombus formation was established. A microfluidic system (BioFlux,  
215 Fluxion Biosciences, Alameda, USA) was used at a shear rate of 1500<sup>-1</sup> (60 dyne)  
216 according to the recommendations of the ISTH standardization committee for  
217 biorheology (14). Briefly, microfluidic channels were coated with collagen (100  
218  $\mu$ g/mL, Collagen Horm, Takeda, Linz, Austria) overnight at 4°C and blocked with

219 2.5% of human serum albumin (HSA, Kedrion, Barga, Italy) 1 h before perfusion at  
220 RT.  
221 Whole blood samples of healthy individuals of blood group O were collected into  
222 hirudin containing monovettes (Sarstedt, Nuembrecht, Germany) and allowed to rest  
223 for 30 min at RT. After splitting the whole blood into aliquots of 200  $\mu$ L, PRP was  
224 prepared via centrifugation (20 min, 120xg, at RT, no break). Afterwards, 45  $\mu$ L of the  
225 supernatant PRP was gently separated and incubated with 5  $\mu$ L of control or ICU  
226 COVID-19 IgG fractions and incubated for 90 min at RT under rotating conditions. 15  
227 min prior to the end of the incubation period, Calcein-FITC (4  $\mu$ M, [Thermo Scientific,  
228 Eugene, Oregon, USA]) was added to each sample. Subsequently, PRP was gently  
229 added back to reconstitute whole blood samples.

230 When indicated, the separated PRP was pretreated with moAb IV.3 or moAb  
231 isotype control at a concentration of 20  $\mu$ g/mL for 30 min at RT. For cAMP induction,  
232 PRP was pretreated with Iloprost (20 nM) or vehicle control (5 min, 37°C) prior to IgG  
233 incubation.

234 Finally, reconstituted whole blood samples were run at a shear rate of 1500s<sup>-1</sup>  
235 (60 dyne) for a maximum of 5 min. Immunofluorescence and bright field images were  
236 taken from 3-5 randomly chosen microscopic fields (x20, Olympus IX73, Olympus  
237 GmbH, Hamburg, Germany). Clot formation was assessed by measuring the % of  
238 surface area coated by thrombus (SAC) of 3-5 images via ImageJ (NIH, Bethesda,  
239 USA) and normalized to the whole area.

#### 240 **Statistical analysis**

241 Statistical analyses were performed using GraphPad Prism 7 (La Jolla, USA). T-test  
242 was used to analyze normally distributed results. Non-parametric test (Mann-Whitney  
243 test) was used when data failed to follow a normal distribution as assessed by

244 D'Agostino and Pearson omnibus normality test. Group comparison was performed  
245 using the Wilcoxon rank-sum test and the Fisher exact test with categorical variables.  
246 A p-value <0.05 was assumed to represent statistical significance.

247 ***Ethics***

248 Studies involving human material were approved by the Ethics Committee of the  
249 Medical Faculty, Eberhard-Karls University of Tuebingen, Germany, and were  
250 conducted in accordance with the declaration of Helsinki.

## 251 **Results**

### 252 ***Patient characteristics***

253 Sera from 26 ICU COVID-19 patients were enrolled in this study between March the  
254 1<sup>st</sup> and June the 16<sup>th</sup> 2020. 21 of these ICU COVID-19 patients were included in a  
255 previous study (Althaus et al. accepted). The mean age of ICU COVID-19 patients  
256 was 58 years (range: 29-88 years). 20/30 (67%) patients had known risk factors for  
257 severe COVID-19 infection as described previously (15), including hypertension  
258 18/30 (60%), obesity 6/30 (20%), coronary artery disease 4/30 (13%) and diabetes  
259 mellitus 6/30 (20%). Elevated D-Dimer levels were detected in all patients (median,  
260 range: 3.4 mg/dL, 0.9-45.0 mg/dL) and thrombosis was diagnosed in 13/30 (43%)  
261 patients. Longitudinal blood samples were available from four COVID-19 patients  
262 who were first admitted to normal ward and later to the ICU for mechanical  
263 ventilation. As ICU control group, 5 patients who were admitted to ICU due to non-  
264 COVID-19 related causes were included in this study.

### 265 ***Sera from ICU COVID-19 patients induce progressive increase of procoagulant*** 266 ***PLTs***

267 To investigate whether sera of ICU COVID-19 patients have the potential to induce  
268 an increased  $\Delta\psi$  depolarization as well as PS externalization on the PLT surface,  
269 wPLTs from healthy individuals were incubated with sera from 26 ICU COVID-19  
270 patients with a severe course of disease as well as 5 ICU non-COVID-19 patients.  
271 Based on the calculated cutoffs (mean+2xSD of healthy controls), 19/26 (73%) sera  
272 from patients with severe COVID-19 disease induced significantly higher  $\Delta\psi$   
273 depolarization in PLTs from healthy donors compared to ICU controls (FI in %  $\Delta\psi$   
274 depolarization $\pm$ SEM: 6.10 $\pm$ 1.12 vs. 0.67 $\pm$ 0.10, p value <0.0001, Fig. 1 A). In addition,

275 significantly higher PS externalization was observed when ICU COVID-19 sera were  
276 incubated with PLTs compared to ICU control sera (FI in % PS $\pm$ SEM: 2.12 $\pm$ 0.19 vs.  
277 1.12 $\pm$ 0.08, p value <0.0001, Fig. 1 B).

278 Next, we sought to investigate the time course of the observed changes in  
279 both markers. Longitudinal blood samples were available from four ICU COVID-19  
280 patients. Sera were collected at hospital admission (normal ward or ICU) and during  
281 a follow up period at ICU for up to 14 days. As shown in Fig. 1 C-F, sera from ICU  
282 COVID-19 patients induced significant changes in  $\Delta\psi$  depolarization, PS  
283 externalization and caspase 3 cleavage as clinical manifestation worsen requiring  
284 admission to ICU. Of note, antibody-induced changes peaked within day 3 and 7 of  
285 the ICU stay (FI in %  $\Delta\psi$  depolarization $\pm$ SEM: 3.71 $\pm$ 0.72, p value 0.0070; and % PS  
286 externalization  $\pm$ SEM: 4.80 $\pm$ 1.11, p value <0.0001, respectively, Suppl. Fig. 1).

287 These findings were further supported by WB analyses, as PLTs incubated with the  
288 corresponding ICU COVID-19 serum induced caspase 3 cleavage in similar kinetic  
289 (Ratio of cleaved caspase 3/procaspase 3 normalized to control $\pm$ SEM: 4.84 $\pm$ 0.45, p  
290 value 0.0035, Fig. 1 E+F). Notably, the rise of PLT markers was associated with  
291 increasing levels of detected IgGs against the spike S protein of SARS-CoV-2 in the  
292 corresponding ICU COVID-19 patients' follow up sera but not in the total IgG  
293 contents of isolated IgG fractions (Suppl. Fig. 2 A and B, respectively). Moreover,  
294 declining PLT-counts were observed as  $\Delta\psi$  depolarization as well as PS  
295 externalization increased, vice versa (Suppl. Fig. 3 A and B, respectively).

296 ***IgGs from severe COVID-19 trigger procoagulant PLTs with increased ability to***  
297 ***form blood clots***

298 To further verify the impact of sera from severe COVID-19 patients on PLTs, the  
299 expression of the alpha granule release and PLT activation marker CD62p was

300 analyzed in two colour FC in parallel to PS. FC analyses revealed that IgG fractions  
301 from severe COVID-19 patients induce remarkable changes in the PLT SSC and  
302 FSC (Fig. 2.1. A+C), as well as in the distribution of CD62p/PS positivity (Fig. 2.1.  
303 B+D). In contrast, the PLT population was almost non-affected after incubation with  
304 IgGs from healthy controls (HCs) or ICU non-COVID-19 control patients. Overall,  
305 higher percentage of double positive events was observed after incubation with IgGs  
306 from ICU COVID-19 patients compared to ICU and to HCs (% CD62p/PS positive  
307 PLTs $\pm$ SEM: 31.63 $\pm$ 3.86 vs. 4.04 $\pm$ 1.16, p value 0.0007; and vs. 2.88 $\pm$ 0.52, p value  
308 <0.0001, respectively, Fig. 2.1. II.). Additionally, significant elevation was observed in  
309 the PS single positive PLT population (% PS positive PLTs $\pm$ SEM: 13.17 $\pm$ 2.05 vs.  
310 2.66 $\pm$ 0.52, p value <0.0001; and vs. 2.36 $\pm$ 0.29, p value 0.0002, Fig. 2.1. I) but not in  
311 the percentage of CD62p single positive PLTs (% CD62p positive PLTs $\pm$ SEM:  
312 19.40 $\pm$ 1.83 vs. 13.53 $\pm$ 1.90, p value 0.1011, Fig. 2.1. III).

313 Next, we sought to investigate the ability of IgG fractions from patients with  
314 severe COVID-19 to cause increased clot formation. PLTs from healthy individuals  
315 were incubated with IgGs from ICU COVID-19 patients or ICU and HCs, added to  
316 autologous whole blood samples and finally perfused through collagen covered  
317 microfluidic channels at a shear rate of 1500 s<sup>-1</sup> (60 dyne). As shown in Fig. 3 A, IgG  
318 from severe COVID-19 patients caused increased clot formation. Overall, significantly  
319 higher surface area coverage by thrombus (SAC) was observed in the presence of  
320 ICU COVID-19 IgGs compared to ICU controls and HCs (mean % SAC $\pm$ SEM:  
321 13.95% $\pm$ 1.55 vs. 2.86 $\pm$ 1.10, p value 0.0070; and vs. 2.70 $\pm$ 0.83, p value 0.0002,  
322 respectively, Fig. 3 B). Together with the increased percentage of procoagulant PLTs  
323 (CD62p/PS positive) in response to ICU COVID-19 IgGs, these findings might  
324 provide a potential explanation for the increased thromboembolic events in severely  
325 affected COVID-19 patients.

326 ***ICU COVID-19 IgGs cause procoagulant PLTs via crosslinking FcγRIIA***

327 To further determine the underlying mechanistic pathways leading to ICU COVID-19  
328 IgG induced formation of procoagulant PLTs, we next considered a potential ligation  
329 of FcγRIIA by patients' sera/IgGs. For this purpose, wPLTs were pretreated with the  
330 moAb IV.3. This FcγRIIA blockade resulted in marked inhibition of the antibody-  
331 induced  $\Delta\psi$  depolarization (FI in %  $\Delta\psi$  depolarization $\pm$ SEM: 5.51 $\pm$ 0.94 vs.  
332 1.18 $\pm$ 0.08, p value 0.0020, Fig. 4.1. A) as well as significant reduction of caspase  
333 activation (Ratio of cleaved caspase 3/procaspase 3 $\pm$ SEM: 4.70 $\pm$ 1.16 vs. 1.33 $\pm$ 0.29,  
334 p value 0.0286, Fig. 4.1. B+C). Intriguingly, the blockade of FcγRIIA almost abolished  
335 the changes in PLTs' FSC and SSC properties (Fig. 4.2. A+C), and markedly  
336 reduced CD62p/PS double positive PLT population compared to isotype-control (%  
337 CD62p/PS positive PLTs $\pm$ SEM: 48.91 $\pm$ 3.05 vs. 12.88 $\pm$ 1.65, p value 0.0078, Fig. 4.2.  
338 II).

339 Next, we analyzed the impact of FcγRIIA blockade on antibody-mediated clot  
340 formation. Pretreatment of PLTs with moAb IV.3 prior to ICU COVID-19 IgG  
341 incubation resulted in significant reduction of clot formation compared to isotype-  
342 control (mean % SAC $\pm$ SEM: 16.49 $\pm$ 1.02 vs. 5.84 $\pm$ 1.93, respectively, p value 0.0090,  
343 Fig. 5 A+B). These results indicate that ICU COVID-19 IgG antibodies that are  
344 present in a subgroup of severe ICU COVID-19 patients have the capability to induce  
345 formation of procoagulant PLTs with increased clotting ability via crosslinking  
346 FcγRIIA.

347 ***Calcium is pivotal for the generation of ICU COVID-19-IgG induced***  
348 ***procoagulant PLTs***



349 Following the detection of an ICU COVID-19 IgG-induced procoagulant PLT  
350 phenotype, we sought to investigate the underlying intracellular molecular  
351 mechanisms. The contribution of calcium was analyzed by the depletion of extra- and  
352 intracellular calcium contents via EGTA and BAPTA, respectively. Extracellular  
353 calcium depletion caused significant inhibition of  $\Delta\psi$  depolarization (FI in %  $\Delta\psi$   
354 depolarization $\pm$ SEM: 3.08 $\pm$ 0.18 vs. 1.94 $\pm$ 0.20, p value 0.0079, Fig. 6.1. A) as well as  
355 marked reduction of caspase 3 cleavage (Ratio of cleaved caspase 3/procaspase  
356 3 $\pm$ SEM: 4.14 $\pm$ 0.65 vs. 1.50 $\pm$ 0.20, p value 0.0079, Fig. 6.1. B+C). Moreover,  
357 depletion of extracellular calcium significantly inhibited ICU COVID-19 IgG induced  
358 alterations of wPLTs' morphology (Fig. 6.2. A-D) as well as the generation of  
359 CD62p/PS positive PLTs (% CD62p/PS positive PLTs $\pm$ SEM: 32.89 $\pm$ 2.77 vs.  
360 6.42 $\pm$ 1.21, p value 0.0039, Fig. 6.2. II).

361 Similar effects were observed as depleting intracellular calcium stores. BAPTA  
362 treatment resulted in significant inhibition of ICU COVID-19 IgG-induced  $\Delta\psi$   
363 depolarization (FI in %  $\Delta\psi$  depolarization $\pm$ SEM: 4.46 $\pm$ 0.73 vs. 0.99 $\pm$ 0.09, p value  
364 0.0039, Fig. 7.1. A) and caspase 3 cleavage (Ratio of cleaved caspase 3/procaspase  
365 3 $\pm$ SEM: 3.50 $\pm$ 0.98 vs. 0.43 $\pm$ 0.06, p value 0.0286, respectively, Fig. 7.1. B+C). In  
366 addition, BAPTA pretreatment of wPLTs resulted in marked prevention of ICU  
367 COVID-19 IgG-induced changes in FSC and SSC (Figure 7.2. A-D as well as  
368 significant reduction of CD62p/PS positive PLTs (% CD62p/PS positive PLTs:  
369 29.58 $\pm$ 3.36 vs. 1.74 $\pm$ 0.39, p value 0.0020, Fig. 7.2. II).

### 370 ***Activation of cAMP protects against ICU COVID-19 IgG induced procoagulant*** 371 ***PLTs***

372 The interplay between the signalling pathways of the intracellular second  
373 messengers, cAMP and calcium, has been shown to have an important role in

374 numerous essential physiological processes during PLT activation and apoptosis (16,  
375 17). Therefore, we investigated the role of cAMP on COVID-19 antibody-induced  
376 formation of procoagulant PLTs. Forskolin, an activator of intracellular ADC that  
377 elevates intracellular levels of cAMP, was recently reported to inhibit the formation of  
378 apoptotic PLTs in immune thrombocytopenia (18). The pretreatment of PLTs with  
379 Forskolin led to significant reduction of ICU COVID-19 IgG-induced  $\Delta\psi$  depolarization  
380 (FI in %  $\Delta\psi$  depolarization $\pm$ SEM:  $5.10\pm 0.70$  vs.  $1.43\pm 0.17$ , p value 0.0079, Fig. 8.1.  
381 A) and caspase 3 cleavage (Ratio of cleaved caspase 3/procaspase 3 $\pm$ SEM:  
382  $3.74\pm 1.14$  vs.  $1.01\pm 0.14$ , p value 0.0313, respectively, Fig. 8.1. B+C). In addition,  
383 Forskolin pretreatment of wPLTs led to reduction of ICU COVID-19 IgG-induced  
384 changes in FSC and SSC properties (Fig. 8.2. A-D) as well as to a significant  
385 inhibition of procoagulant PLT generation (% CD62p/PS positive PLTs $\pm$ SEM:  
386  $35.29\pm 1.58$  vs.  $12.26\pm 2.74$ , p value 0.0313, Fig. 8.2. II). These findings indicate that  
387 the elevation of intracellular cAMP prevents ICU COVID-19 IgG-induced formation of  
388 procoagulant PLTs.

389 More importantly and of high clinical interest, similar protective effect was  
390 observed with Iloprost, an already approved cAMP inducer (19). In fact, Iloprost  
391 pretreatment of wPLTs led to marked reductions of ICU COVID-19 IgG-induced  $\Delta\psi$   
392 depolarization (FI of %  $\Delta\psi$  depolarization $\pm$ SEM:  $4.66\pm 0.57$  vs.  $1.77\pm 0.32$ , p value  
393 0.0078, Fig. 9.1. A), and cleavage of caspase 3 (Ratio of cleaved caspase  
394 3/procaspase 3 $\pm$ SEM:  $4.69\pm 1.45$  vs.  $2.0348\pm 0.38$ , p value 0.0156, respectively, Fig.  
395 9.1. B+C). In addition, Iloprost pretreatment led to a significant reduction of changes  
396 in PLT morphology (Fig. 9.2. A-D) as well as in the number of procoagulant  
397 CD62p/PS positive PLTs (% CD62p/PS positive PLTs $\pm$ SEM:  $41.36\pm 3.60$  vs.  
398  $22.22\pm 3.92$ , p value 0.0156, Fig. 9.2. II). Noteworthy, no significant changes were

399 observed in the number of CD62p single positive PLTs (% CD62p positive  
400 PLTs $\pm$ SEM: 24.48 $\pm$ 2.2 vs. 26.51 $\pm$ 3.94, p value 0.6875).

401           Based on these findings we were interested whether Iloprost might affect the  
402 ability to form blood clots. Pretreatment of PLTs with Iloprost showed a marked  
403 reduction in ICU COVID-19 IgG-induced clot formation compared to vehicle (mean %  
404 SAC $\pm$ SEM: 14.63 $\pm$ 2.31 vs. 3.85 $\pm$ 0.95, respectively, p value 0.0079, Fig. 10. A+B).  
405 These findings provide the first evidence for a potential therapeutic use of Iloprost in  
406 the treatment of the antibody-induced coagulopathy that is observed in COVID-19  
407 disease.

## 408 **Discussion**

409 Our study showed that IgGs from patients with severe COVID-19 are able to induce  
410 procoagulant PLTs with increased potential for clot formation via crosslinking Fc $\gamma$ RIIA  
411 in a calcium depending manner. Most importantly, we showed that cAMP activation  
412 by an approved drug, namely Iloprost, can sufficiently inhibit the initiation of  
413 procoagulant PLTs and the subsequent increased clot formation. These data may  
414 have tremendous clinical implications.

415         Meanwhile, it is well established that COVID-19 infection is associated with  
416 systemic prothrombotic state and increased incidence of thromboembolic  
417 complications (20). However, the pre-sequelae events leading to the coagulopathy  
418 observed in COVID-19 still remains elusive. Data from our study demonstrate the  
419 presence of PLT-reactive IgG antibodies that harbour the ability to induce marked  
420 changes in PLTs in terms of increased  $\Delta\psi$  depolarization, PS externalization and P-  
421 selectin expression, which are characteristic for procoagulant PLTs. A novel finding,  
422 and potentially of high clinical interest, is that antibody-mediated formation of  
423 procoagulant PLTs was associated with the clinical course as these changes  
424 progressively increased as patients needed ventilation and peaked between day 3  
425 and 7 on ICU. Probably, the kinetic of these markers might have predictive value to  
426 monitor COVID-19-induced coagulopathy. In fact, PS externalization was recently  
427 found to be a predictive biomarker for thromboembolic complications related to  
428 cardiovascular therapeutic devices (21). In contrast to PS, conventional markers of  
429 PLT activation were declared in this study to fail the detection of early activation  
430 events leading to thrombosis.

431         The alterations in PLTs that were observed in our study after incubation with  
432 sera from patients with severe COVID-19 infection, such as  $\Delta\psi$  disruption, caspase 3

433 cleavage and PS externalization, could be found in apoptotic as well as procoagulant  
434 PLTs. The involvement of PLT apoptosis to promote prothrombotic conditions has  
435 been controversially discussed. In fact, recent data suggests that apoptotic PLTs are  
436 unable to promote prothrombotic conditions (10). However, a clear dissection of the  
437 molecular events leading to prothrombotic PLTs is challenging since activation of the  
438 apoptosis caspase pathway has been described in the late phase of agonist-induced  
439 PLT activation as well as in PLTs from patients with chronic kidney disease (22, 23),  
440 which are prone to thromboembolic events. Our findings showed that antibody-  
441 mediated  $\Delta\psi$  disruption and caspase cleavage is associated with the induction of a  
442 CD62p/PS positive PLT population suggesting that IgG antibodies in COVID-19  
443 induce procoagulant rather than apoptotic PLTs. In fact, activated PLTs were shown  
444 elsewhere to be predominant in COVID-19 patients (6). In particular, CD62p positive  
445 PLTs were suggested to be involved in thrombosis in COVID-19 via the interaction  
446 with neutrophil granulocytes leading to NET formation and increased interaction with  
447 the inflamed vessel wall. Our data showed that COVID-19 IgG-antibodies trigger a  
448 PLT population with procoagulant potential. An important finding that was reinforced  
449 by data from an ex vivo microfluidic circulation system which revealed an increased  
450 clot formation in the presence of COVID-19 IgG-antibodies.

451 Motivated by these novel functional data, we thought to dissect the exact  
452 mechanistic pathways involved in the COVID-19 IgG-induced procoagulant status.  
453 We found that ICU COVID-19 IgG-mediated changes in wPLTs involves the ligation  
454 of the immune receptor Fc $\gamma$ R1IA. The blockade of Fc $\gamma$ R1IA significantly inhibits ICU  
455 COVID-19 IgG-induced changes in  $\Delta\psi$  depolarization as well as cleavage of caspase  
456 3. Most importantly, Fc $\gamma$ R1IA blockade reduced procoagulant CD62p/PS positive  
457 PLTs and subsequently inhibited COVID-19 antibody-induced ex vivo clot formation.  
458 While this findings are novel for COVID-19-associated coagulopathy, the correlation

459 between FcγRIIA ligation and increased risk for thromboembolic events is well  
460 established for heparin-induced thrombocytopenia (HIT) (24). Interestingly, the IgG  
461 antibody formation peaks in HIT within 5-10 day after exposure to heparin and is  
462 associated with PLT consumption and increased risk for thrombosis (25). Similarly, in  
463 our study the ability of ICU COVID-19 sera to induce procoagulant PLTs was most  
464 pronounced between day 3 and 7. Of note, antibody-induced alterations in PLT  
465 markers were accompanied by enhanced levels of IgG antibodies against the Spike  
466 S epitope of SARS-CoV-2. These findings might suggest a transient onset of  
467 misdirected autoimmune mechanisms that result in the emergence of PLT-reactive  
468 antibodies leading to a prothrombotic status in severe COVID-19 infection.

469 Calcium is involved in many biological mechanistic pathways in PLTs (16). In  
470 response to PLT agonists, calcium is released from the PLT internal stores which is  
471 followed by amplifying second wave extracellular calcium influx via store (SOCE) and  
472 receptor operated calcium entry (ROCE), respectively (26). The role of calcium  
473 signalling in ITAM (immunoreceptor tyrosine-based activation motif) coupled GPVI  
474 and (hem)ITAM coupled CLEC-2 receptor signalling has been well established in the  
475 last few years (27). Additionally, FcγRIIA ligation has been shown to induce calcium  
476 mobilization via ITAM signalling prior to platelet aggregation(28). In our study, the  
477 depletion of calcium in the extracellular compartment inhibited ICU COVID-19 IgG-  
478 induced procoagulant changes. This finding indicates that alterations in SOCE or  
479 ROCE might be involved in the antibody-mediated generation of procoagulant PLTs  
480 in COVID-19. In fact, the regulative role of SOCE for procoagulant PS externalization  
481 has been previously reported, as SOCE channel inhibition resulted in reduced PS  
482 externalization in human erythroleukemia cells (29). In addition, reduced PS  
483 externalization and decreased clot formation was observed in chimeric mice that  
484 express mutated impaired SOCE calcium channel Orai1 R93W on the PLT surface,

485 indicating that SOCE is a major inductor of PLT PS externalization and procoagulant  
486 PLT formation (30). A potential role of ITAM-regulated signalling leading to  
487 procoagulant PLTs has been also suggested. Calcium depletion inhibited GP VI  
488 induced formation of procoagulant PLTs (31). In this study, the authors proposed that  
489 distinct signalling cascades, most likely tyrosine and extracellular calcium dependent,  
490 could be involved in the formation of procoagulant PLTs. Our findings emphasize the  
491 role of extracellular calcium in FcγRIIA (ITAM) mediated procoagulant PLT formation.  
492 Another possible explanation for these finding could be the loss of distinct calcium-  
493 dependent conformational properties of PLT epitopes that are targeted by COVID-19  
494 IgG antibodies. Dimeric PLT GP IIb/IIIa, the receptor for fibrinogen and well known  
495 immunogenic epitopes of PLT-reactive autoantibodies in immune thrombocytopenia  
496 (ITP), has been well characterized to be structurally dependent on extracellular  
497 calcium levels (32). Although this might be currently too speculative, the depletion of  
498 extracellular calcium might have inhibited antibody binding to such conformation-  
499 sensitive epitopes on GP IIb/IIIa. ICU COVID-19 IgG-induced PLT alterations were  
500 dependent on extracellular as well as intracellular calcium levels. Since PLT  
501 apoptosis has been described to be independent of calcium (33), our finding  
502 indicates that COVID-19 IgGs trigger FcγRIIA -mediated events that result in  
503 procoagulant PLT formation in a calcium-dependent manner. In fact, similar findings  
504 were reported by recently showing that actin-mediated PLT shape change and  
505 phosphoinositide 3-kinase activity in response to FcγRIIA ligation in dependent on  
506 intracellular calcium (28). The absence of ICU COVID-19 IgG-mediated PLT changes  
507 could be also due to inactivation of calcium dependent cysteine protease calpain that  
508 is crucial for the conformational changes in GP IIb/IIIa (34, 35). Another possible  
509 explanation could be the inactivation of calcium dependent TMEM16F that bears  
510 essential properties for membrane phospholipid scrambling and microparticle

511 generation (10). Future studies could explore the exact mechanisms by which  
512 calcium contributes to procoagulant PLT formation in COVID-19.

513 COVID-19 antibody-induced procoagulant PLTs were significantly inhibited by  
514 the use of inducers of adenylate cyclase (ADC) that are well known to cause  
515 increased cAMP levels in PLTs (36). The protective effect of cAMP was further  
516 demonstrated, as Iloprost, an already approved prostacyclin derivate and ADC,  
517 efficiently prevented the formation of procoagulant PLTs in response to COVID-19  
518 antibodies. Finally and of high clinical importance, Iloprost pretreatment of PLTs  
519 markedly reduced COVID-19 IgG-induced clot formation on collagen suggesting that  
520 cAMP inducers may have potential to prevent life threatening thromboembolic events  
521 in COVID-19 antibody-mediated coagulopathy. Another minor finding from our  
522 microfluidic system was that Iloprost, although significantly inhibited antibody-  
523 mediated thrombus formation, did not affect the CD62p-single positive population.  
524 Since Iloprost prevented clot formation, this finding might indicate that PS rather than  
525 CD62p exposure on the PLT surface is pivotal to trigger the onset of thromboembolic  
526 events.

527 Our study is subjected to some limitations. First, as an observational,  
528 monocentric study, we cannot conclude that the reported associations between IgG  
529 antibodies and changes in activation/apoptosis markers in COVID-19 are causal for  
530 the thrombosis or specific for the disease. Second, we cannot exclude the possibility  
531 of remaining residual confounding or unmeasured potential confounders in our  
532 mechanistic studies. Third, the low number of patients does not enable a final and  
533 robust statistical analysis to assess clinical outcomes in patients with increased  
534 procoagulant PLTs. Nevertheless, data presented in this study may provide a  
535 background for future studies to dissect mechanisms related to PLT activation that  
536 are involved in the progression of COVID-19.



537           Taken together, our study shows that IgG antibodies from patients with severe  
538 COVID-19 are able to stimulate FcγRIIA leading to the induction of procoagulant  
539 PLTs with an increased ability of clot formation. These processes are dependent on  
540 calcium and can be efficiently inhibited by cAMP inducers suggesting that ADC might  
541 represent a potentially promising target to prevent thromboembolic complications in  
542 COVID-19 disease.

543

544

545

546

547

## 548 **Author contributions**

549 J.Z., K.A., T.B. and P.R. designed the study. P.R. and H.H. were responsible for the  
550 treatment of the patients. K.A. and H.H. collected and analyzed the clinical data. J.Z.,  
551 K.A., H.J., L.P., A.S. and A.W. performed the experiments. J.Z., K.A., H.J., L.P., A.S.  
552 and A.W. collected the data. J.Z., K.A., H.J., L.P., A.S., A.W., V.M., P.R. and T.B.  
553 analyzed the data, interpreted the results and wrote the manuscript. All authors read  
554 and approved the manuscript.

555

## 556 **Conflict of interest**

557 The authors have no conflict of Interests.

558

## 559 **Acknowledgements**

560 This work was supported by grants from the “Ministerium für Wissenschaft,  
561 Forschung und Kunst Baden-Württemberg” to J.Z. and T.B. and from the Herzstiftung  
562 to T.B. (BA5158/4 and TSG-Study) and TÜFF-Gleichstellungsförderung to K.A.  
563 (2563-0-0). We thank Karoline Weich for her excellent technical support. The authors  
564 thank Susanne Staub for editing the article as native English speaker.

565

566

567

568

569

570

571 **Figure legends**

572 **Fig. 1-ICU COVID-19 patient serum induced effects on PLTs during disease.**

573 **(A+B)** ICU COVID-19 (n=26) or ICU non-COVID-19 control (n=5) patient serum  
574 induced changes in  $\Delta\psi$  as well as PS externalization in wPLTs were analyzed by FC.  
575 **(C+D)** Sera of 4 ICU COVID-19 patients were collected for up to 14 days during  
576 hospitalization and analyzed for their ability to induce changes in  $\Delta\psi$  as well as PS  
577 externalization in wPLTs via FC. **(E)** Representative WB image of detected cleaved  
578 caspase 3 (cleaved-) and procaspase 3 (pro-) levels in wPLTs that were incubated  
579 with follow up sera of one ICU COVID-19 patient (indicated in **C+D**). **(F)**  
580 Densitometric analysis of cleaved caspase 3/procaspase 3 ratios in wPLTs that were  
581 incubated with follow up sera of ICU COVID-19 patients (n=4, [indicated in **C+D**])  
582 normalized to control.  $\alpha$ -Tubulin served as loading control. Data are presented as  
583 mean $\pm$ SEM of the measured fold increase compared to control. ns, not significant;  
584 \*p<0.05, \*\*p<0.01, \*\*\*p<0.001 and \*\*\*\*p<0.0001. The number of patient sera tested is  
585 reported in each graph. Dot lines in **(A+B)** represent the calculated cutoffs  
586 determined testing sera from healthy donors as mean of fold increase (FI)+2xSEM.  
587 HC, healthy control;  $\Delta\psi$ , inner mitochondrial transmembrane potential; N, number of  
588 HCs or patients; PS, phosphatidylserine.

589 **Fig. 2-ICU COVID-19 IgGs induce procoagulant PLTs and increased clot**  
590 **formation.**

591 **Fig. 2.1. (A+C)** Representative FC plots of wPLTs' FSC vs. SSC properties after HC  
592 or ICU COVID-19 IgG incubation. **(B+D)** Following HC or ICU COVID-19 IgG  
593 incubation, CD42a positive gated wPLTs were analyzed for PS externalization and  
594 expression of CD62p via Annexin V-FITC and CD62p-APC antibody staining,

595 respectively. **Fig. 2.1. (I-IV)** represent quantitative gate distribution of CD42a positive  
596 events as indicated in **Fig. 2.1. (B+D)**. Data are shown as percentage $\pm$ SEM of  
597 Annexin V-FITC and or CD62p-APC positive labeled wPLTs after incubation with HC  
598 (n=8), ICU non-COVID-19 (n=5) or ICU COVID-19 IgG (n=10). ns, not significant;  
599 \*p<0.05, \*\*p<0.01, \*\*\*p<0.001 and \*\*\*\*p<0.0001. The number of patients and healthy  
600 donors tested is reported in each graph. HC, healthy control; N, number of HCs or  
601 patients; PS, phosphatidylserine.

602 **Fig. 3-ICU COVID-19 IgG cause increased clot formation on collagen.**

603 **(A)** PRP from healthy individuals with the blood group O was incubated with HC  
604 (n=6), ICU non-COVID-19 control (n=3) or ICU COVID-19 IgG (n=10), labelled with  
605 FITC conjugated calcein and perfused through microfluidic channels at a shear rate  
606 of 1500<sup>-1</sup> (60 dyne) for 5 min after reconstitution into autologous whole blood. Images  
607 were aquired at x20 magnification in the fluorescent (upper panel) as well as in the  
608 BF channel (lower panel). Scale bar 50 $\mu$ m. **(B)** Mean percentage of surface area  
609 covered (mean % SAC) $\pm$ SEM by thrombus in the presence of HC (n=6), ICU non-  
610 COVID-19control (n=3) and ICU COVID-19 (n=10) IgG after 5 min perfusion time. ns,  
611 not significant; \*p<0.05, \*\*p<0.01, \*\*\*p<0.001 and \*\*\*\*p<0.0001. The number of  
612 patients and healthy donors tested is reported in each graph. HC, healthy control; N,  
613 number of HCs or patients.

614 **Fig. 4-ICU COVID-19 IgG induced formation of procoagulant PLTs is Fc $\gamma$ RIIA**  
615 **dependent.**

616 **Fig. 4.1. (A)** ICU COVID-19 patient serum (n=10) induced changes of  $\Delta\psi$  in wPLTs  
617 were analyzed in the presence or absence of moAb IV.3 via FC. Data are presented  
618 as mean $\pm$ SEM of the measured fold increase compared to control. **(B+C)**

619 Representative WB image of detected cleaved caspase 3 (cleaved-) and procaspase  
620 3 (pro-) levels in wPLTs that were incubated with ICU COVID-19 IgG (n=4) in the  
621 presence or absence of moAb IV.3.  $\alpha$ -Tubulin served as loading control. **(C)**  
622 Densitometric analysis of cleaved caspase 3/procaspase 3 ratios from immunoblots  
623 as indicated in **(B, n=4)** normalized to control. **Fig. 4.2. (A+C)** Representative FC  
624 plots of wPLTs' FSC vs. SSC after ICU COVID-19 IgG incubation in IV.3 pretreated  
625 wPLTs. **(B+D)** Gate distribution of CD42a positive PS (Annexin V-FITC) externalizing  
626 and CD62p (CD62p-APC) expressing wPLTs after ICU COVID-19 IgG incubation in  
627 isotype control or IV.3 pretreated wPLTs. **Fig. 4.2. (I-IV)** shows quantitative gate  
628 distributions of wPLTs with or without IV.3 pretreatment, after ICU COVID-19 IgG  
629 incubation as shown in **Fig. 4.2. (B+D)**. Data are presented as percentage $\pm$ SEM of  
630 Annexin V-FITC and or CD62p-APC positive labeled wPLTs after incubation with HC  
631 (n=3) or ICU COVID-19 IgG (n=8) in the presence or absence of moAb IV.3. ns, not  
632 significant; \*p<0.05, \*\*p<0.01, \*\*\*p<0.001 and \*\*\*\*p<0.0001. The number of patients  
633 and healthy donors tested is reported in each graph. HC, healthy control; N, number  
634 of HCs or patients; PS, phosphatidylserine.

635 **Fig. 5-Fc $\gamma$ RIIA inhibition prevents ICU COVID-19 IgG induced increased clot**  
636 **formation.**

637 **(A)** PRP from healthy individuals with the blood group O was incubated with HC  
638 (n=2) or ICU COVID-19 IgG (n=3 patients) in the presence of moAb IV.3 or isotype  
639 control (moAb) and perfused through microfluidic channels at a shear rate of 1500<sup>-1</sup>  
640 (60 dyne) for 5 min. Images were acquired at x20 magnification in fluorescent (upper  
641 panel) as well as in the BF channel (lower panel). Scale bar 50 $\mu$ m. **(B)** mean %  
642 SAC $\pm$ SEM induced by HC (n=2) or ICU COVID-19 IgG (n=3) in the presence or  
643 absence of moAb IV.3 or isotype control (moAb). ns, not significant; \*p<0.05,

644 \*\*p<0.01, \*\*\*p<0.001 and \*\*\*\*p<0.0001. The number of patients and healthy donors  
645 tested is reported in each graph. moAb, monoclonal isotype control; HC, healthy  
646 control; N, number of HCs or patients

647 **Fig. 6-ICU COVID-19 IgG induced formation of procoagulant PLTs is dependent**  
648 **on extracellular calcium.**

649 **Fig. 6.1. (A)** FC assessment of ICU COVID-19 IgG (n=5) induced changes of  $\Delta\psi$  in  
650 wPLTs that were pretreated with EGTA (1 mM) or vehicle. Data are presented as  
651 mean $\pm$ SEM of the measured fold increase compared to control. **(B+C)**

652 Representative WB image of detected cleaved caspase 3 (cleaved-) and procaspase  
653 3 (pro-) levels in EGTA (1 mM) vehicle pretreated wPLTs that were incubated with  
654 ICU COVID-19 IgG (n=6), respectively.  $\alpha$ -Tubulin served as loading control. **(C)**

655 Densitometric analysis of immunoblots indicated in **(B)** for cleaved caspase  
656 3/procaspase 3 ratios from WB data as indicated in **(B, [n=5])** normalized to control.

657 **Fig. 6.2. (A+C)** Representative FC plots of wPLTs' FSC vs. SSC after ICU COVID-  
658 19 IgG incubation in EGTA (1mM) or vehicle pretreated wPLTs. **(B+D)** Gate  
659 distribution of CD42a positive PS (Annexin V-FITC) externalizing and CD62p  
660 (CD62p-APC) expressing wPLTs after ICU COVID-19 IgG incubation in EGTA (1mM)

661 or vehicle pretreated wPLTs. **Fig. 6.2. (B+D)** Gate distribution of CD42a positive PS  
662 (Lactadherin-FITC) externalizing and CD62p (CD62p-APC) expressing wPLTs after  
663 ICU COVID-19 IgG incubation in EGTA (1 mM) or vehicle containing wPLTs. **Fig.**

664 **6.2. (I-IV)** shows quantitative gate distribution of wPLTs after incubation with ICU  
665 COVID-19 IgG. Data are presented as percentage $\pm$ SEM of Lactadherin-FITC or  
666 CD62p-APC positive labeled wPLTs after incubation with HC (n=3) or ICU COVID-19  
667 IgG (n=9) in vehicle or EGTA (1 mM) pretreated wPLTs. ns, not significant; \*p<0.05,

668 \*\*p<0.01, \*\*\*p<0.001 and \*\*\*\*p<0.0001. The number of patients and healthy donors

669 tested is reported in each graph. HC, healthy control; N, number of HCs or patients;  
670 PS, phosphatidylserine.

671 **Fig. 7-Depletion of intracellular calcium abrogates ICU COVID-19 IgG induced**  
672 **procoagulant PLT formation.**

673 **Fig. 7.1 (A)** ICU COVID-19 IgG (n=9) induced changes of  $\Delta\psi$  in wPLTs were  
674 analyzed in the presence or absence of the intracellular calcium chelator BAPTA (20  
675  $\mu$ M). **(B)** Representative WB image of cleaved caspase 3 (cleaved-) and procaspase  
676 3 (pro-) were detected with anti-caspase 3 antibody in wPLTs that were incubated  
677 with ICU COVID-19 IgG in BAPTA (20  $\mu$ M) or vehicle pretreated wPLTs.  $\alpha$ -Tubulin  
678 served as loading control. **(C)** Densitometric analysis of cleaved caspase  
679 3/procaspase 3 ratios from immunoblots (indicated in **B**, [n=4]) normalized to control.

680 **Fig. 7.2. (A+C)** FC plots of wPLTs' FSC and. SSC after ICU COVID-19 IgG  
681 incubation in vehicle or BAPTA (20  $\mu$ M) preloaded wPLTs. **(B+D)** FC plots of CD42a  
682 positive gated wPLTs that were incubated with ICU COVID-19 IgG in vehicle or in  
683 BAPTA (20  $\mu$ M) preloaded wPLTs. **Fig. 7.2.(I-IV)** quantitative gate distribution of  
684 CD42a positive wPLTs based on the gate settings shown in **Fig. 7.2. (B+D)**. Data are  
685 shown as percentage $\pm$ SEM of Lactadherin-FITC and or CD62p-APC positive labeled  
686 wPLTs after HC (n=3) or ICU COVID-19 IgG (n=10) incubation in normal or BAPTA  
687 (20  $\mu$ M) preloaded wPLTs. Ns,not significant; \*p<0.05, \*\*p<0.01, \*\*\*p<0.001 and  
688 \*\*\*\*p<0.0001. The number of patients and healthy donors tested is reported in each  
689 graph. HC, healthy control; N, number of HCs or patients, PS; phosphatidylserine.

690 **Fig. 8-Forskolin protects ICU COVID-19 IgG induced procoagulant PLT**  
691 **formation.**

692 **Fig. 8.1. (A)** FC analysis of ICU COVID-19 IgG (n=5 patients) induced changes in  $\Delta\psi$   
693 of wPLTs, that were pretreated with vehicle or the ADC inductor Forskolin (2.25  $\mu$ M)  
694 for 30 min at 37°C. Data are presented as mean $\pm$ SEM of the measured fold increase  
695 compared to control. **(B)** Representative WB image of cleaved caspase 3 (cleaved-)  
696 and procaspase 3 (pro-) levels detected in wPLTs that were incubated with ICU  
697 COVID-19 IgG in vehicle or Forskolin (2.25  $\mu$ M) pretreated wPLTs.  $\alpha$ -Tubulin served  
698 as loading control. **(C)** Densitometric assessed ratios of cleaved caspase  
699 3/procaspase 3 (as indicated in **B** [n=6]) normalized to control. **Fig. 8.2. (A+C)** FC  
700 plots of wPLTs' FSC vs. SSC after ICU COVID-19 IgG incubation in vehicle or  
701 Forskolin (2.25  $\mu$ M) pretreated wPLTs. **(B+D)** Gate distribution of CD42a positive  
702 wPLTs that were incubated with ICU COVID-19 IgG vehicle or Forskolin (2.25  $\mu$ M)  
703 pretreated wPLTs. **Fig. 8.2. (I-IV)** Quantitative distribution of CD42a positive wPLTs  
704 based on the gate settings shown in **Fig. 8.2. (B+D)**. Data are shown as percentage  
705  $\pm$ SEM of Annexin V-FITC and or CD62p-APC positive labeled wPLTs that were  
706 incubated with IgGs from HC (n=3) or ICU COVID-19 IgG (n=6) in vehicle or  
707 Forskolin (2.25  $\mu$ M) pretreated wPLTs. ns, not significant; \*p<0.05, \*\*p<0.01,  
708 \*\*\*p<0.001 and \*\*\*\*p<0.0001. The number of patients and healthy donors tested is  
709 reported in each graph. HC, healthy control; N, number of HCs or patients; PS,  
710 phosphatidylserine.

711

712 **Fig. 9-cAMP elevation via Iloprost prevents ICU COVID-19 IgG induced**  
713 **procoagulant PLTs.**

714 **Fig. 9.1. (A)** Changes in  $\Delta\psi$  depolarization induced by ICU COVID-19 IgG (n=8  
715 patients) were analyzed in vehicle or Iloprost (20 nM) pretreated wPLTs via FC. Data



716 are presented as mean $\pm$ SEM of the measured fold increase compared to control. **(B)**  
717 Representative WB image of detected caspase 3 (cleaved-) and procaspase 3 (pro-)  
718 levels in wPLTs that were pretreated with vehicle or Iloprost (20 nM) prior to ICU  
719 COVID-19 IgG incubation.  $\alpha$ -Tubulin served as loading control. **(C)** Densitometric  
720 analysis of cleaved caspase 3/procaspase 3 ratios from the WB data (indicated in **B**,  
721 [n=7]) normalized to control. **Fig. 9.2. (A+C)** FC detected changes in wPLTs' FSC vs.  
722 SSC properties after ICU COVID-19 IgG incubation in vehicle or Iloprost (20 nM)  
723 pretreated wPLTs. **Fig. 9.2. (B+D) (E+G)** Gate distribution of CD42a positive vehicle  
724 or Iloprost (20 nM) pretreated wPLTs that were incubated with ICU COVID-19 IgG.  
725 **Fig. 9.2. (I-IV)** Quantitative distribution of the CD42a positive wPLT population based  
726 on the gate settings shown in **Fig. 9.2. (B+D)**. Data are shown as percentage $\pm$ SEM  
727 of Annexin V-FITC and or CD62p-APC positive labeled wPLTs that were incubated  
728 with HC (n=3) or ICU COVID-19 IgG (n=6) in vehicle or Iloprost (20 nM) pretreated  
729 wPLTs. ns, not significant; \*p<0.05, \*\*p<0.01, \*\*\*p<0.001 and \*\*\*\*p<0.0001. The  
730 number of patients and healthy donors tested is reported in each graph. HC, healthy  
731 control; N, number of HCs or patients; PS, phosphatidylserine.

732 **Fig. 10-Iloprost inhibits ICU COVID-19 IgG induced increased clot formation.**

733 **(A)** PRP from healthy individuals with the blood group O was incubated with HC  
734 (n=3) or ICU COVID-19 IgG (n=5) in the presence of vehicle or Iloprost (20 nM). After  
735 reconstitution into autologous whole blood, samples were perfused through  
736 microfluidic channels at a shear rate of 1500<sup>-1</sup> (60 dyne) for 5 min. Pictures were  
737 acquired at x20 magnification in fluorescent (upper panel) as well as in the BF channel  
738 (lower panel). Scale bar 50 $\mu$ m. **(B)** Mean % SAC $\pm$ SEM induced by HC (n=3) or ICU  
739 COVID-19 IgG (n=5) in the presence of vehicle or Iloprost (20 nM). ns, not significant;  
740 \*p<0.05, \*\*p<0.01, \*\*\*p<0.001 and \*\*\*\*p<0.0001. The number of patients and healthy

741 donors tested is reported in each graph. HC, healthy control; N, number of HCs or  
742 patients; PS, phosphatidylserine.

743

744

## 745 **References:**

746

- 747 1. Zhou F, Yu T, Du R, Fan G, Liu Y, Liu Z, et al. Clinical course and risk factors for mortality of  
748 adult inpatients with COVID-19 in Wuhan, China: a retrospective cohort study. *Lancet*.  
749 2020;395(10229):1054-62.
- 750 2. Hanff TC, Mohareb AM, Giri J, Cohen JB, Chirinos JA. Thrombosis in COVID-19. *Am J Hematol*.  
751 2020;95(12):1578-89.
- 752 3. Iba T, Levy JH, Levi M, Connors JM, Thachil J. Coagulopathy of Coronavirus Disease 2019. *Crit*  
753 *Care Med*. 2020;48(9):1358-64.
- 754 4. Henry BM, Vikse J, Benoit S, Favaloro EJ, Lippi G. Hyperinflammation and derangement of  
755 renin-angiotensin-aldosterone system in COVID-19: A novel hypothesis for clinically suspected  
756 hypercoagulopathy and microvascular immunothrombosis. *Clin Chim Acta*. 2020;507:167-73.
- 757 5. Hottz ED, Azevedo-Quintanilha IG, Palhinha L, Teixeira L, Barreto EA, Pao CRR, et al. Platelet  
758 activation and platelet-monocyte aggregate formation trigger tissue factor expression in patients  
759 with severe COVID-19. *Blood*. 2020;136(11):1330-41.
- 760 6. Manne BK, Denorme F, Middleton EA, Portier I, Rowley JW, Stubben C, et al. Platelet gene  
761 expression and function in patients with COVID-19. *Blood*. 2020;136(11):1317-29.
- 762 7. de Witt SM, Verdoold R, Cosemans JM, Heemskerk JW. Insights into platelet-based control of  
763 coagulation. *Thromb Res*. 2014;133 Suppl 2:S139-48.
- 764 8. Swieringa F, Spronk HMH, Heemskerk JWM, van der Meijden PEJ. Integrating platelet and  
765 coagulation activation in fibrin clot formation. *Res Pract Thromb Haemost*. 2018;2(3):450-60.
- 766 9. Agbani EO, Poole AW. Procoagulant platelets: generation, function, and therapeutic targeting  
767 in thrombosis. *Blood*. 2017;130(20):2171-9.
- 768 10. Reddy EC, Rand ML. Procoagulant Phosphatidylserine-Exposing Platelets in vitro and in vivo.  
769 *Front Cardiovasc Med*. 2020;7:15.
- 770 11. Hua VM, Chen VM. Procoagulant platelets and the pathways leading to cell death. *Semin*  
771 *Thromb Hemost*. 2015;41(4):405-12.
- 772 12. Greinacher A, Michels I, Kiefel V, Mueller-Eckhardt C. A rapid and sensitive test for diagnosing  
773 heparin-associated thrombocytopenia. *Thromb Haemost*. 1991;66(6):734-6.
- 774 13. Marini I, Zlamal J, Faul C, Holzer U, Hammer S, Pelzl L, et al. Autoantibody-mediated  
775 desialylation impairs human thrombopoiesis and platelet life span. *Haematologica*. 2019.
- 776 14. Mangin PH, Gardiner EE, Nesbitt WS, Kerrigan SW, Korin N, Lam WA, et al. In vitro flow based  
777 systems to study platelet function and thrombus formation: Recommendations for standardization:  
778 Communication from the SSC on Biorheology of the ISTH. *J Thromb Haemost*. 2020;18(3):748-52.
- 779 15. Huang C, Wang Y, Li X, Ren L, Zhao J, Hu Y, et al. Clinical features of patients infected with  
780 2019 novel coronavirus in Wuhan, China. *Lancet*. 2020;395(10223):497-506.
- 781 16. Mammadova-Bach E, Nagy M, Heemskerk JWM, Nieswandt B, Braun A. Store-operated  
782 calcium entry in thrombosis and thrombo-inflammation. *Cell Calcium*. 2019;77:39-48.
- 783 17. Nagy Z, Smolenski A. Cyclic nucleotide-dependent inhibitory signaling interweaves with  
784 activating pathways to determine platelet responses. *Res Pract Thromb Haemost*. 2018;2(3):558-71.
- 785 18. Zhao L, Liu J, He C, Yan R, Zhou K, Cui Q, et al. Protein kinase A determines platelet life span  
786 and survival by regulating apoptosis. *J Clin Invest*. 2017;127(12):4338-51.

- 787 19. Fisch A, Michael-Hepp J, Meyer J, Darius H. Synergistic interaction of adenylate cyclase  
788 activators and nitric oxide donor SIN-1 on platelet cyclic AMP. *Eur J Pharmacol.* 1995;289(3):455-61.
- 789 20. Tang N, Li D, Wang X, Sun Z. Abnormal coagulation parameters are associated with poor  
790 prognosis in patients with novel coronavirus pneumonia. *J Thromb Haemost.* 2020;18(4):844-7.
- 791 21. Roka-Moia Y, Walk R, Palomares DE, Ammann KR, Dimasi A, Italiano JE, et al. Platelet  
792 Activation via Shear Stress Exposure Induces a Differing Pattern of Biomarkers of Activation versus  
793 Biochemical Agonists. *Thromb Haemost.* 2020;120(5):776-92.
- 794 22. Shcherbina A, Remold-O'Donnell E. Role of caspase in a subset of human platelet activation  
795 responses. *Blood.* 1999;93(12):4222-31.
- 796 23. Bonomini M, Dottori S, Amoroso L, Arduini A, Sirolli V. Increased platelet phosphatidylserine  
797 exposure and caspase activation in chronic uremia. *J Thromb Haemost.* 2004;2(8):1275-81.
- 798 24. Chong BH, Fawaz I, Chesterman CN, Berndt MC. Heparin-induced thrombocytopenia:  
799 mechanism of interaction of the heparin-dependent antibody with platelets. *Br J Haematol.*  
800 1989;73(2):235-40.
- 801 25. Warkentin TE. Clinical picture of heparin-induced thrombocytopenia (HIT) and its  
802 differentiation from non-HIT thrombocytopenia. *Thromb Haemost.* 2016;116(5):813-22.
- 803 26. Rink TJ, Sage SO. Calcium signaling in human platelets. *Annu Rev Physiol.* 1990;52:431-49.
- 804 27. Rayes J, Watson SP, Nieswandt B. Functional significance of the platelet immune receptors  
805 GPVI and CLEC-2. *J Clin Invest.* 2019;129(1):12-23.
- 806 28. Barkalow KL, Falet H, Italiano JE, Jr., van Vugt A, Carpenter CL, Schreiber AD, et al. Role for  
807 phosphoinositide 3-kinase in Fc gamma RIIA-induced platelet shape change. *Am J Physiol Cell Physiol.*  
808 2003;285(4):C797-805.
- 809 29. Kunzelmann-Marche C, Freyssinet JM, Martinez MC. Regulation of phosphatidylserine  
810 transbilayer redistribution by store-operated Ca<sup>2+</sup> entry: role of actin cytoskeleton. *J Biol Chem.*  
811 2001;276(7):5134-9.
- 812 30. Bergmeier W, Oh-Hora M, McCarl CA, Roden RC, Bray PF, Feske S. R93W mutation in Orai1  
813 causes impaired calcium influx in platelets. *Blood.* 2009;113(3):675-8.
- 814 31. Heemskerk JW, Vuist WM, Feijge MA, Reutelingsperger CP, Lindhout T. Collagen but not  
815 fibrinogen surfaces induce bleb formation, exposure of phosphatidylserine, and procoagulant activity  
816 of adherent platelets: evidence for regulation by protein tyrosine kinase-dependent Ca<sup>2+</sup> responses.  
817 *Blood.* 1997;90(7):2615-25.
- 818 32. Tomiyama Y, Kosugi S. Autoantigenic epitopes on platelet glycoproteins. *Int J Hematol.*  
819 2005;81(2):100-5.
- 820 33. Schoenwaelder SM, Yuan Y, Josefsson EC, White MJ, Yao Y, Mason KD, et al. Two distinct  
821 pathways regulate platelet phosphatidylserine exposure and procoagulant function. *Blood.*  
822 2009;114(3):663-6.
- 823 34. Mattheij NJ, Gilio K, van Kruchten R, Jobe SM, Wieschhaus AJ, Chishti AH, et al. Dual  
824 mechanism of integrin alphaIIb beta3 closure in procoagulant platelets. *J Biol Chem.*  
825 2013;288(19):13325-36.
- 826 35. Kulkarni S, Jackson SP. Platelet factor XIII and calpain negatively regulate integrin  
827 alphaIIb beta3 adhesive function and thrombus growth. *J Biol Chem.* 2004;279(29):30697-706.
- 828 36. Smolenski A. Novel roles of cAMP/cGMP-dependent signaling in platelets. *J Thromb*  
829 *Haemost.* 2012;10(2):167-76.
- 830

Figure 1

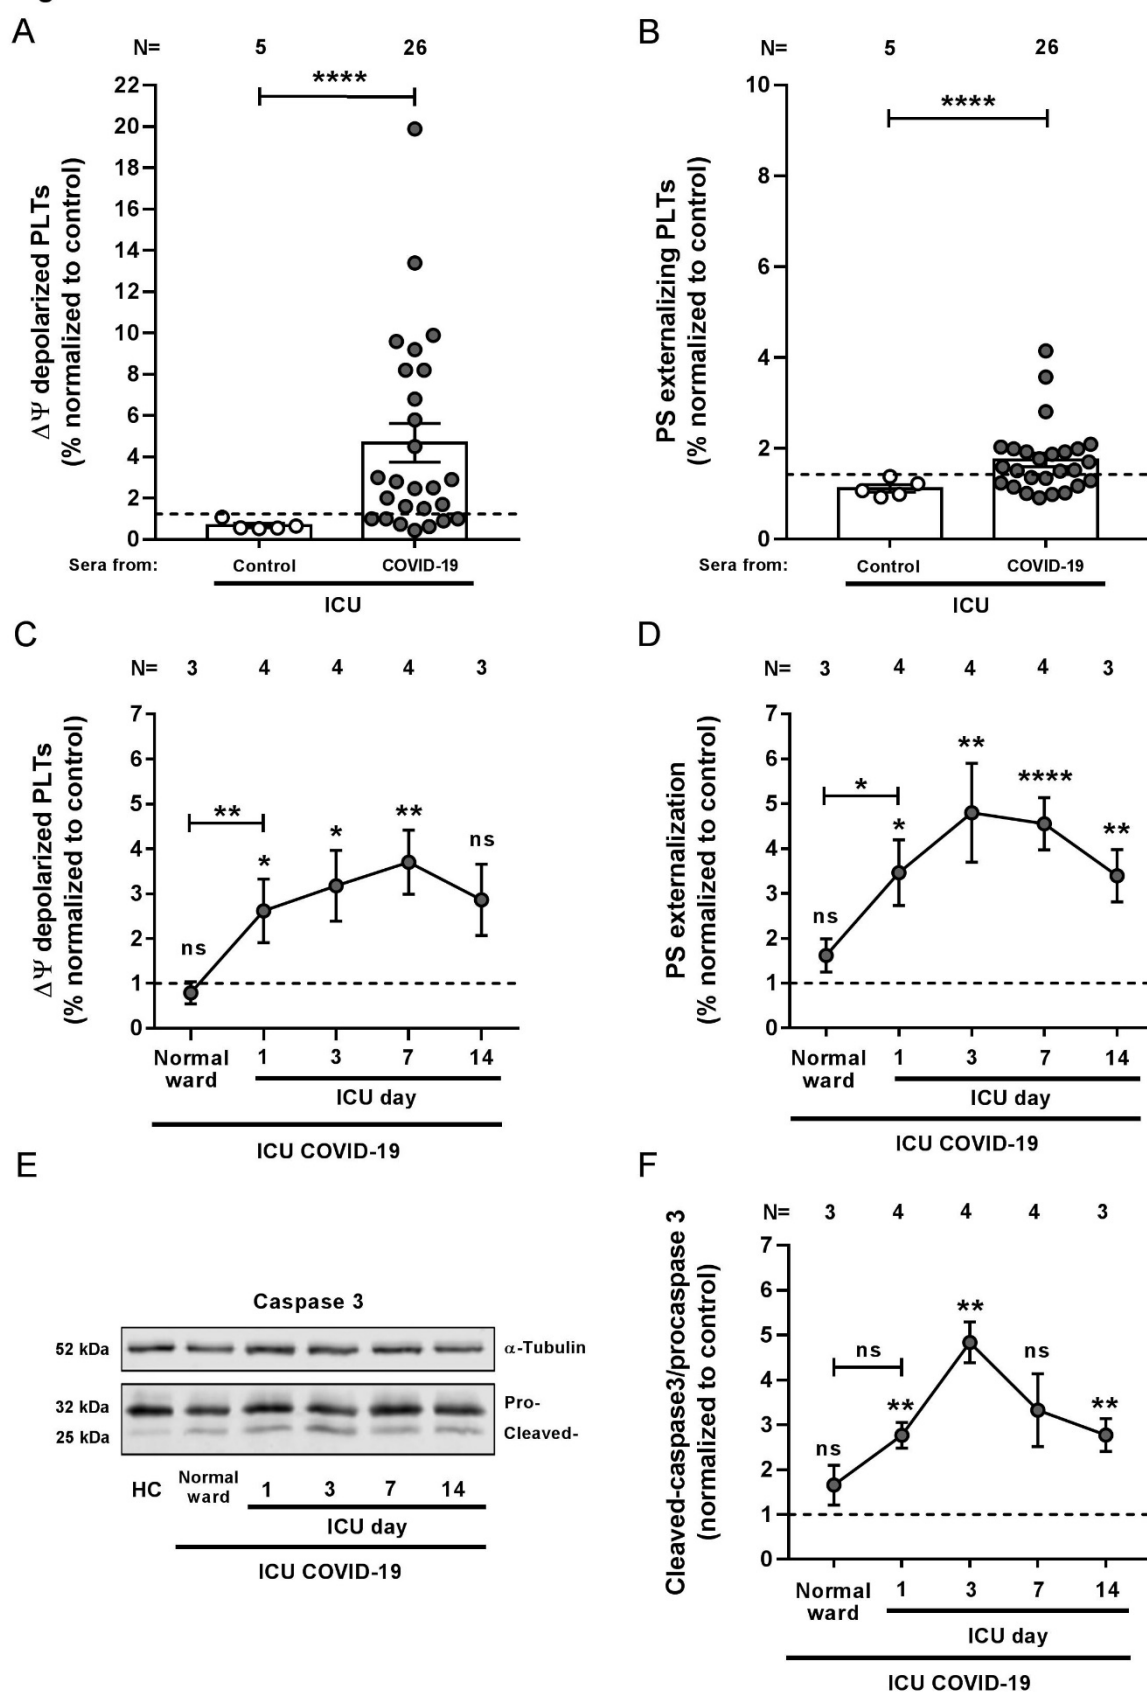

Figure 2.1.

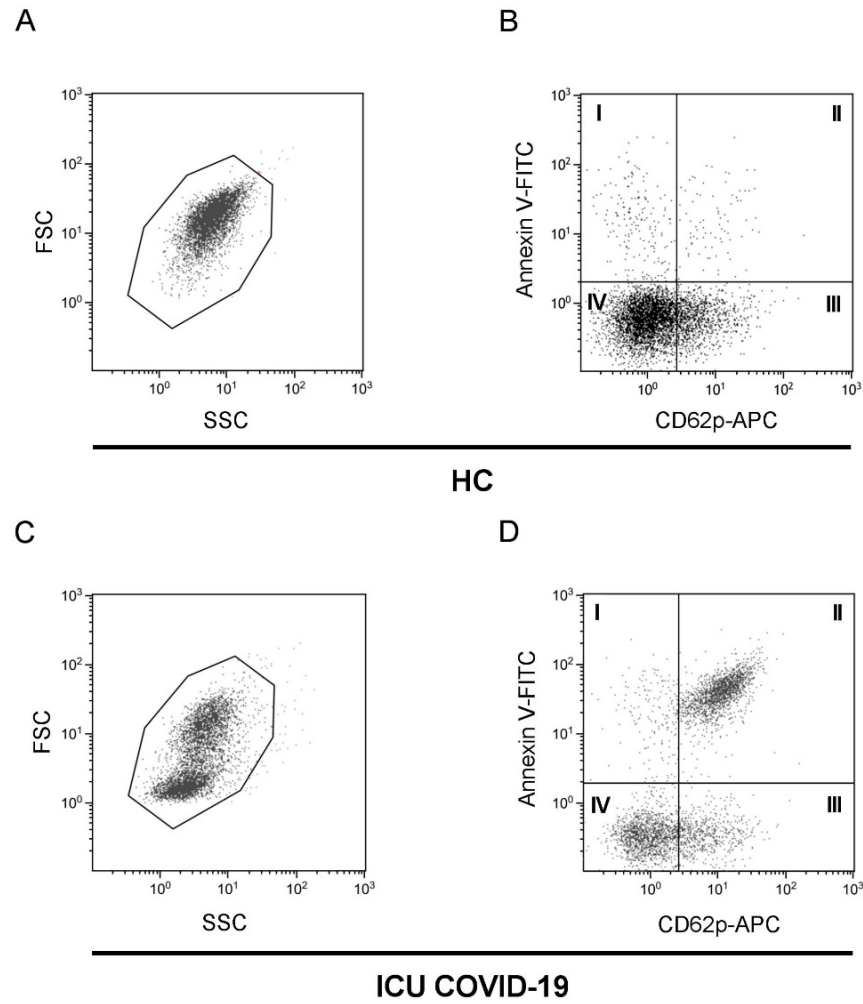

Figure 2.1.

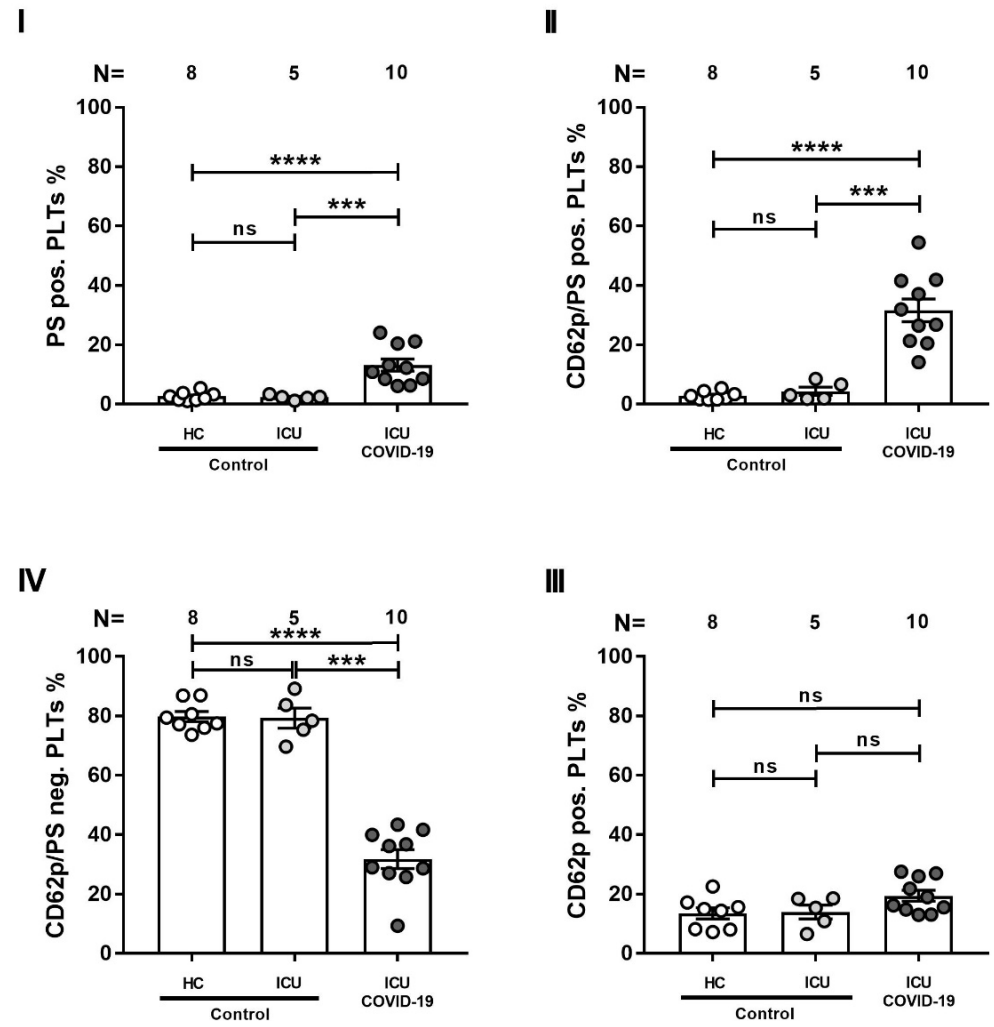

Figure 3

A

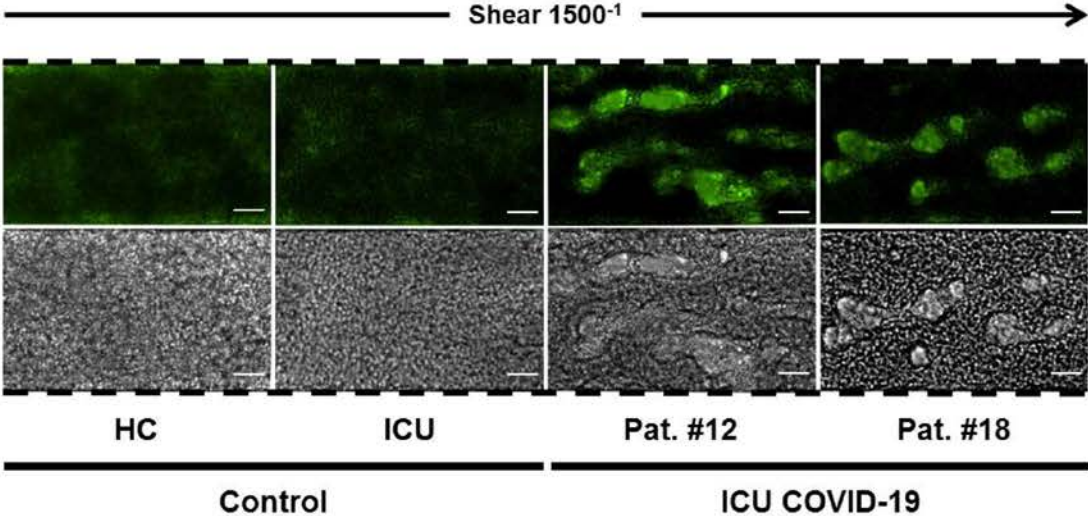

B

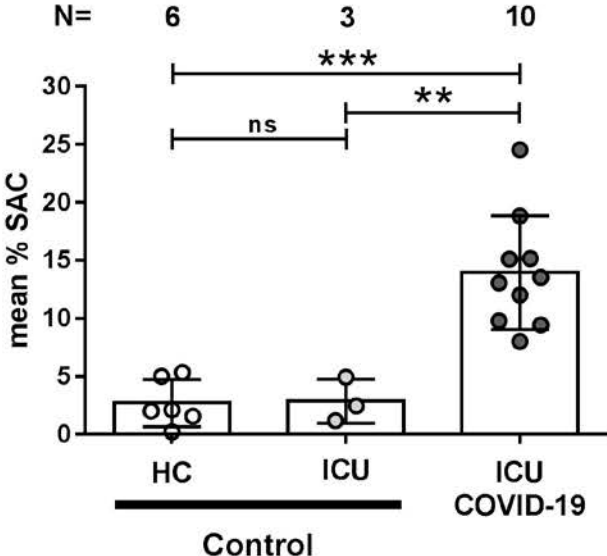

Figure 4.1.

A

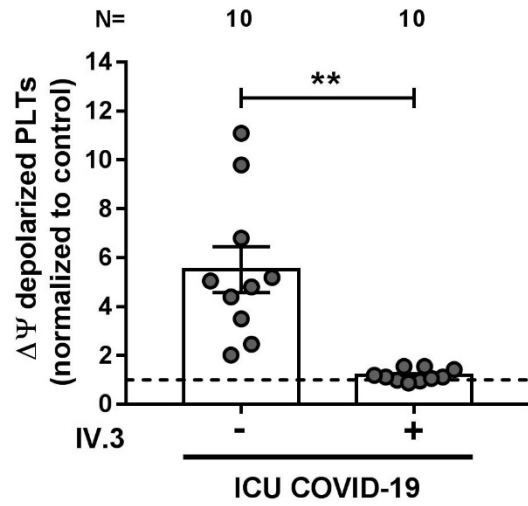

B

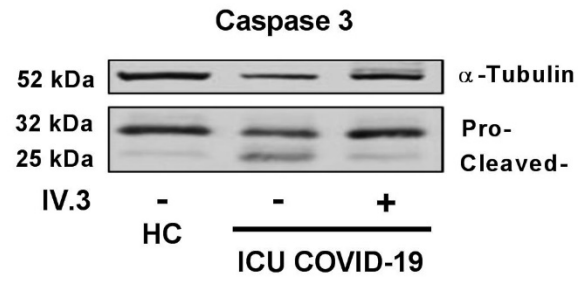

C

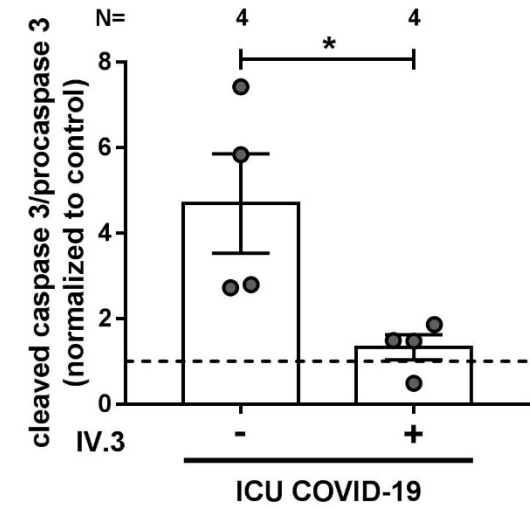

Figure 4.2.

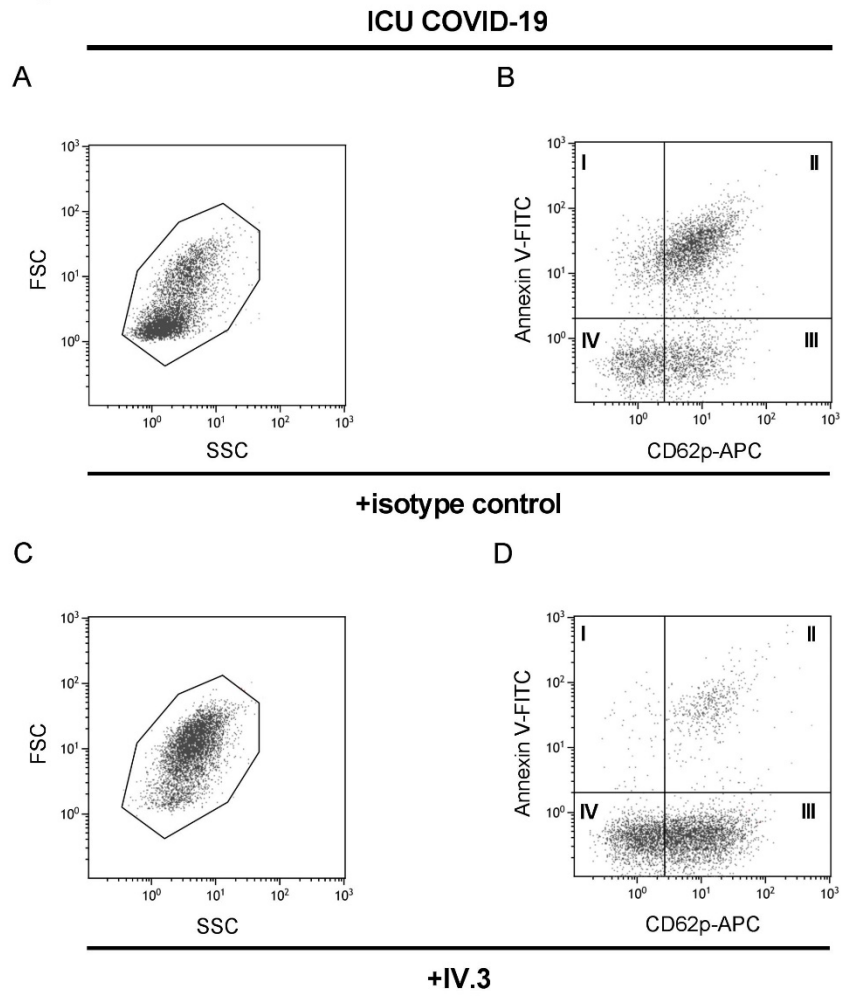

Figure 4.2. I-IV

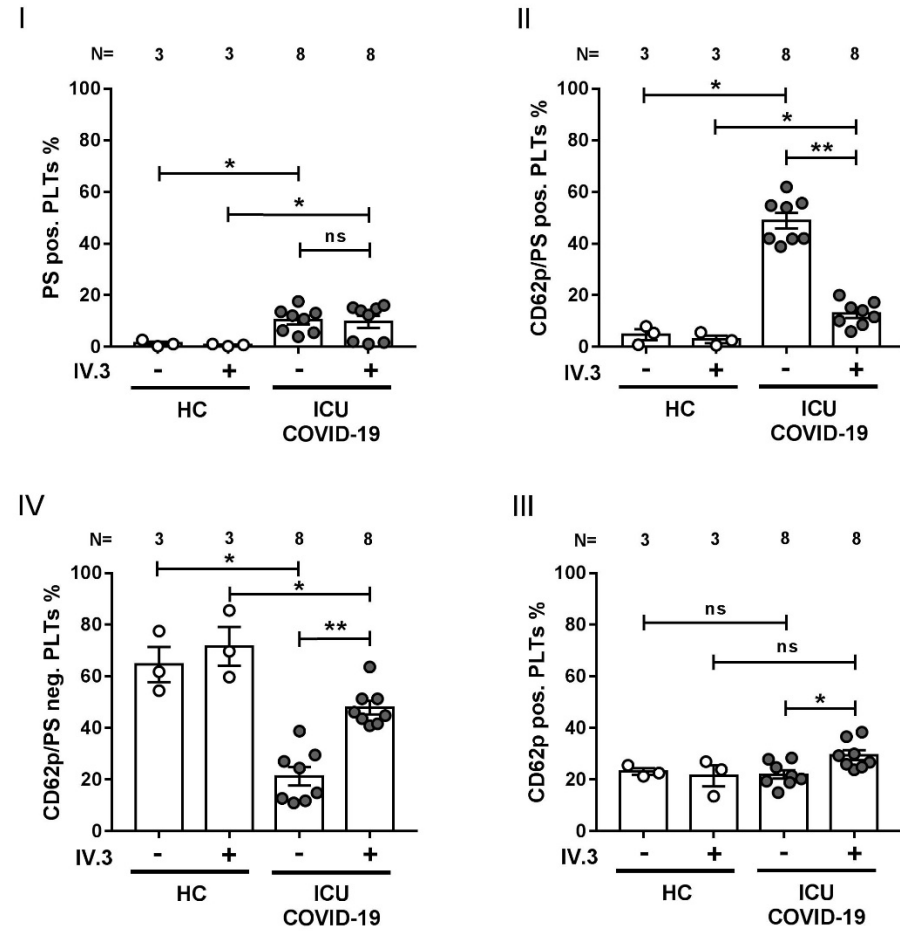



Figure 5

A

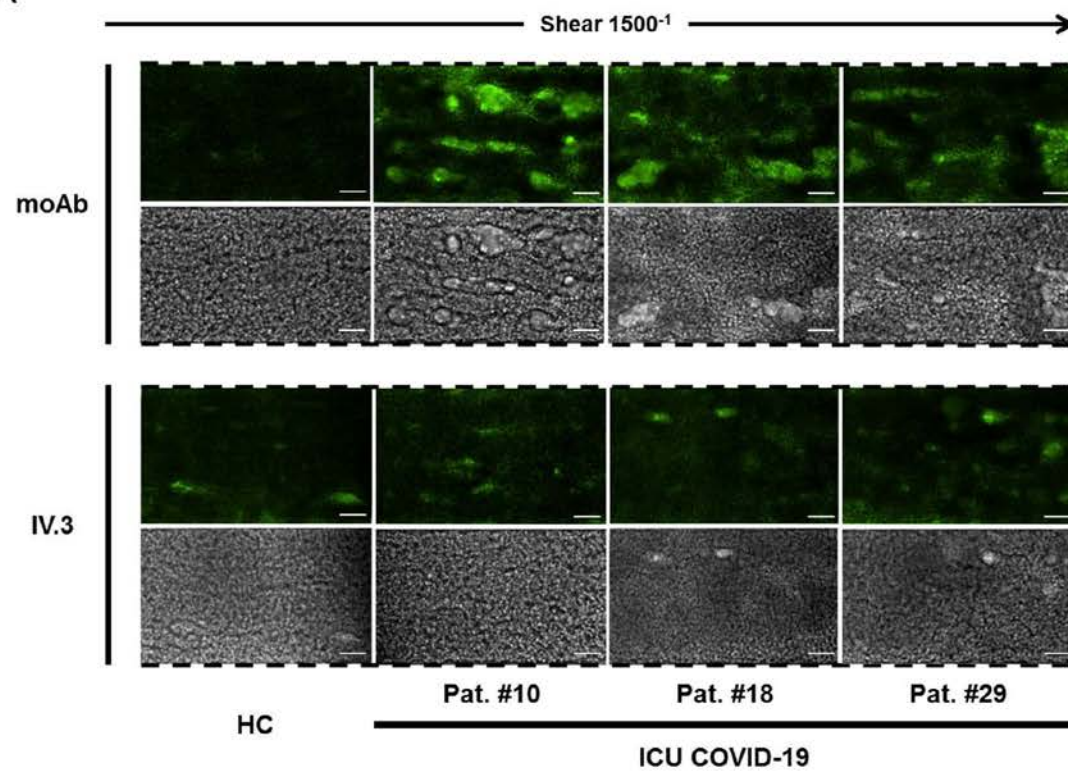

B

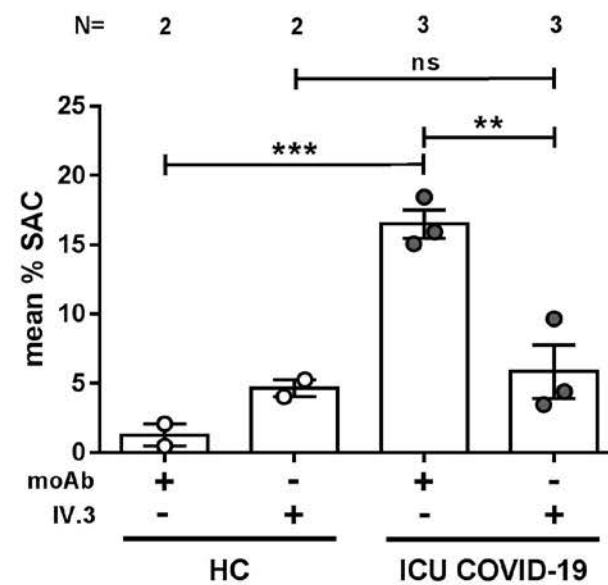

Figure 6.1.

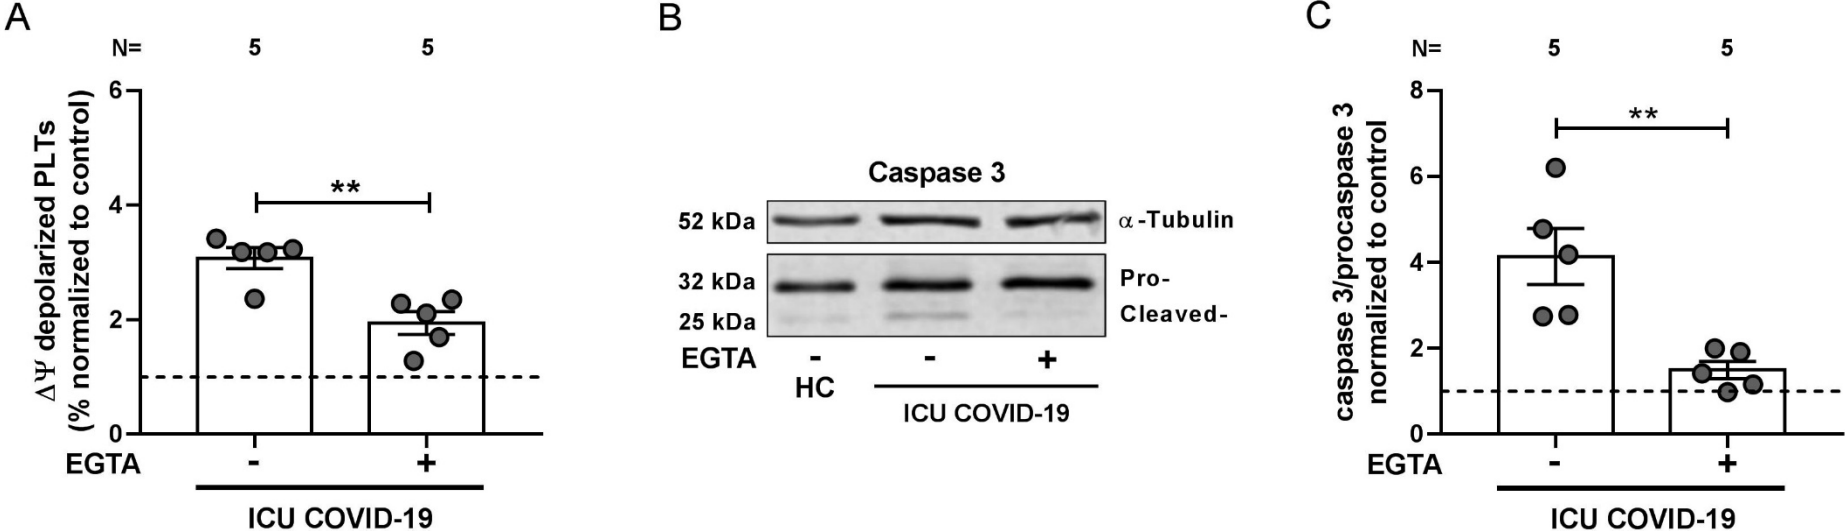

Figure 6.2.

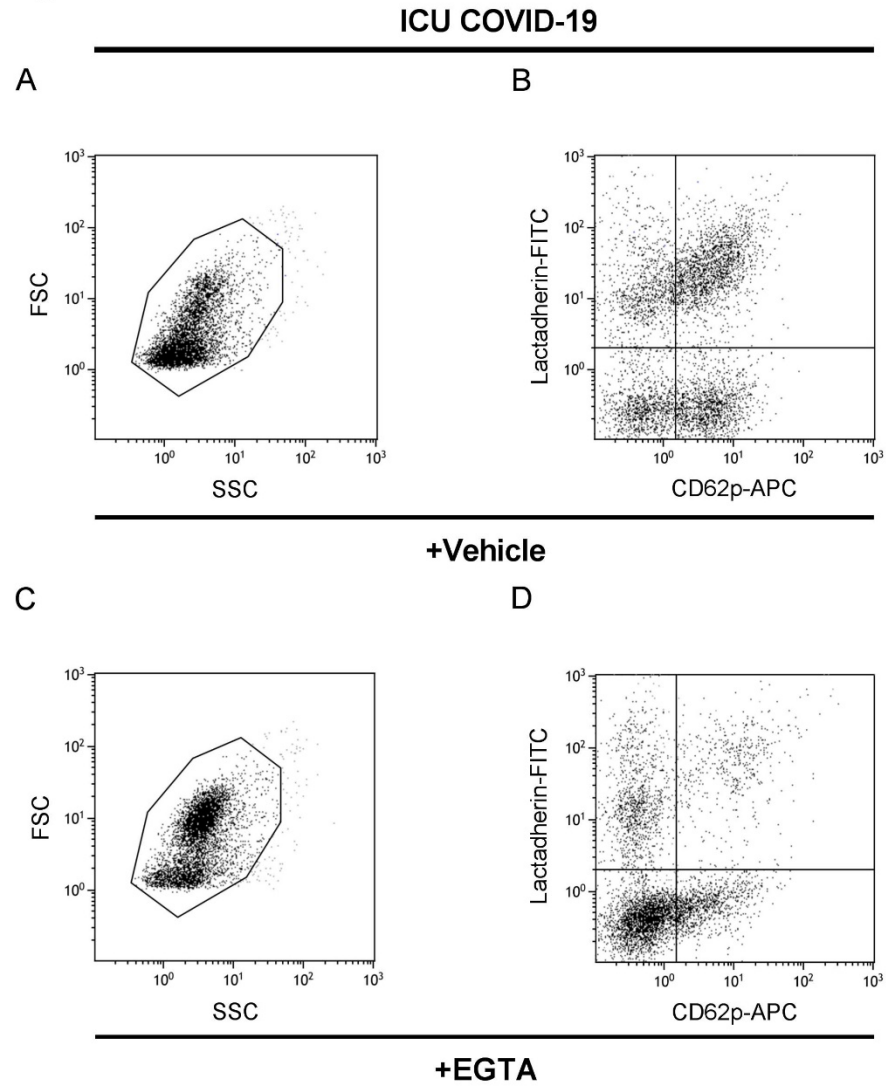

Figure 6.2. I-IV

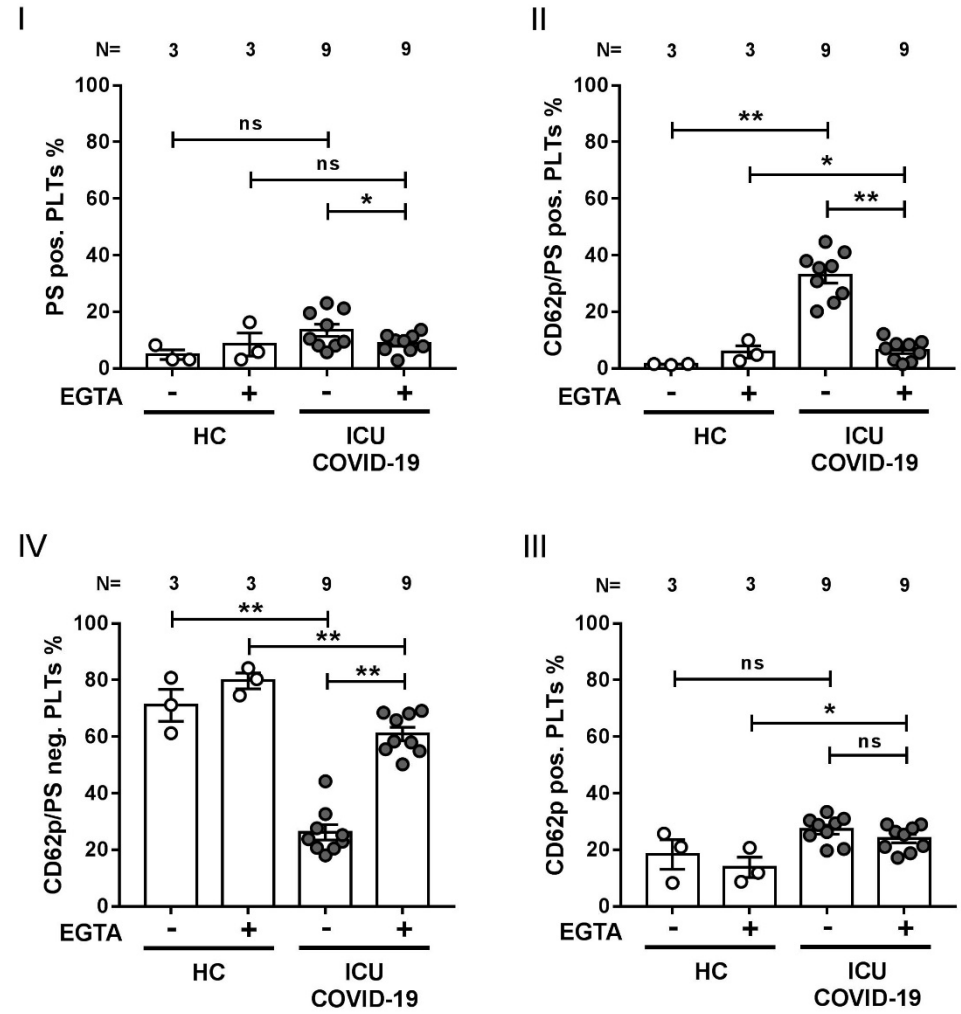

Figure 7.1.

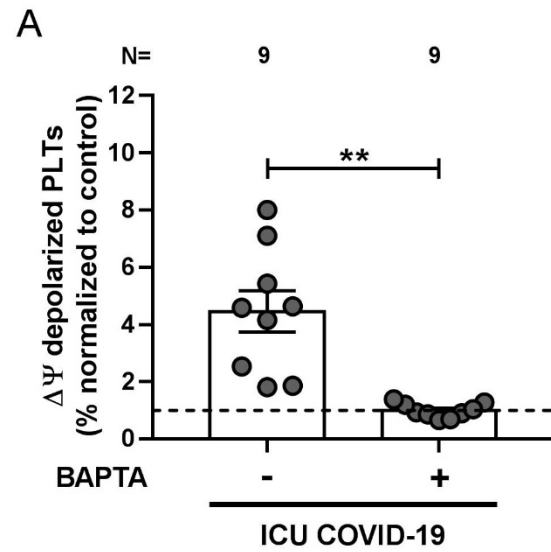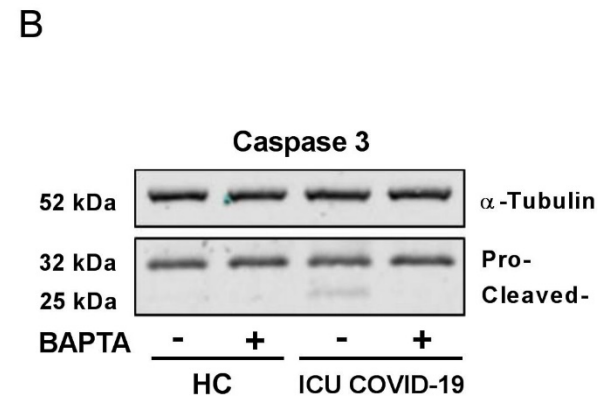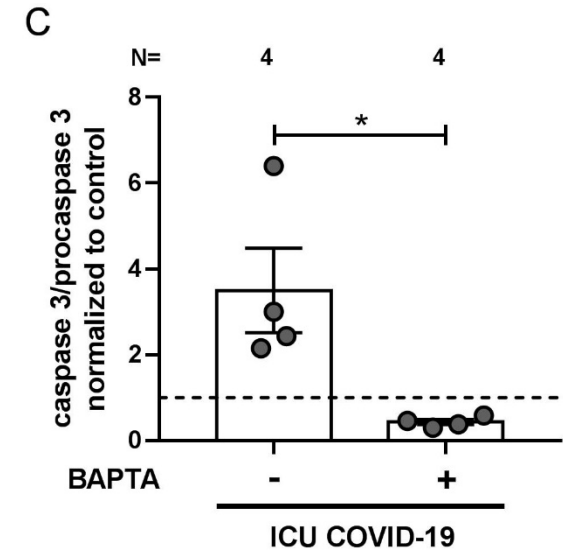

Figure 7.2.

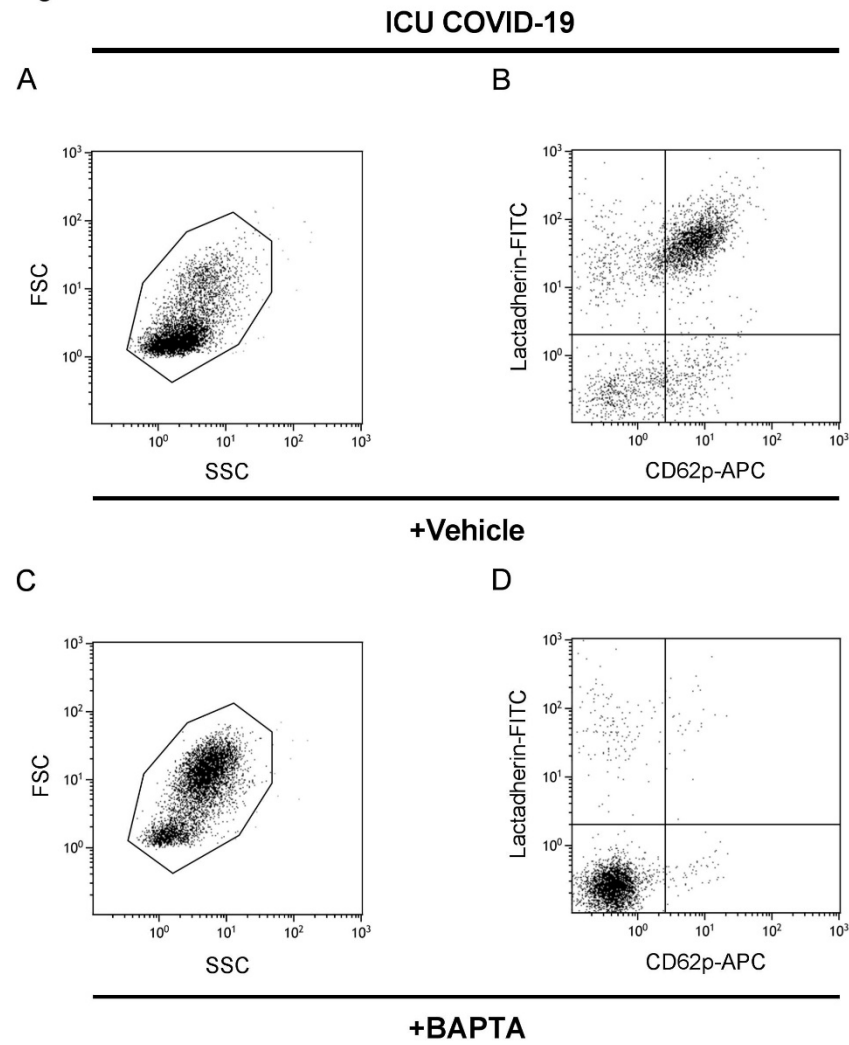

Figure 7.2. I-IV

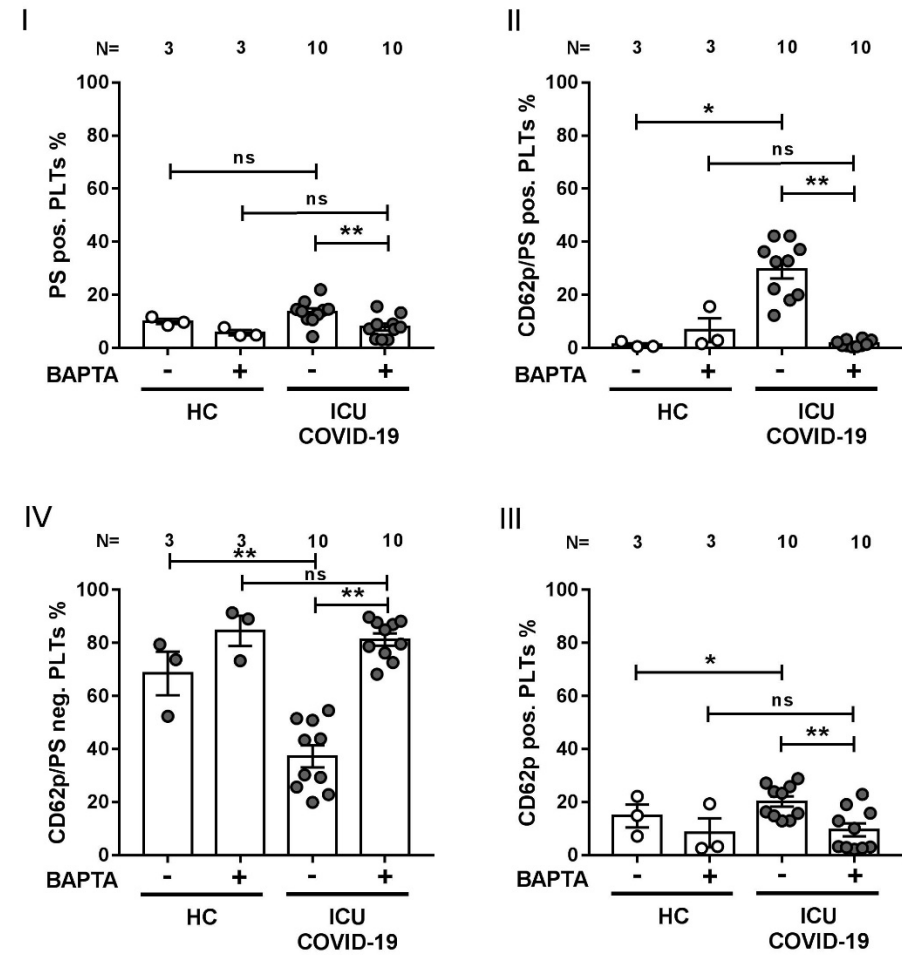

Figure 8.1.

A

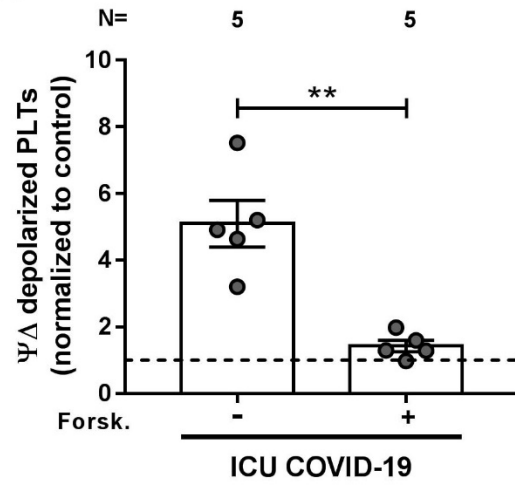

B

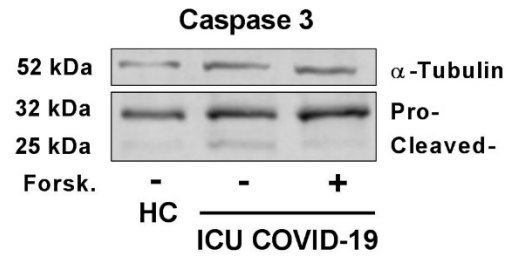

C

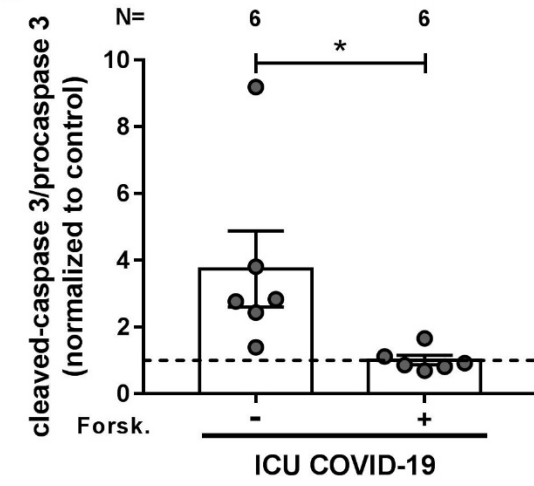

Figure 8.2.

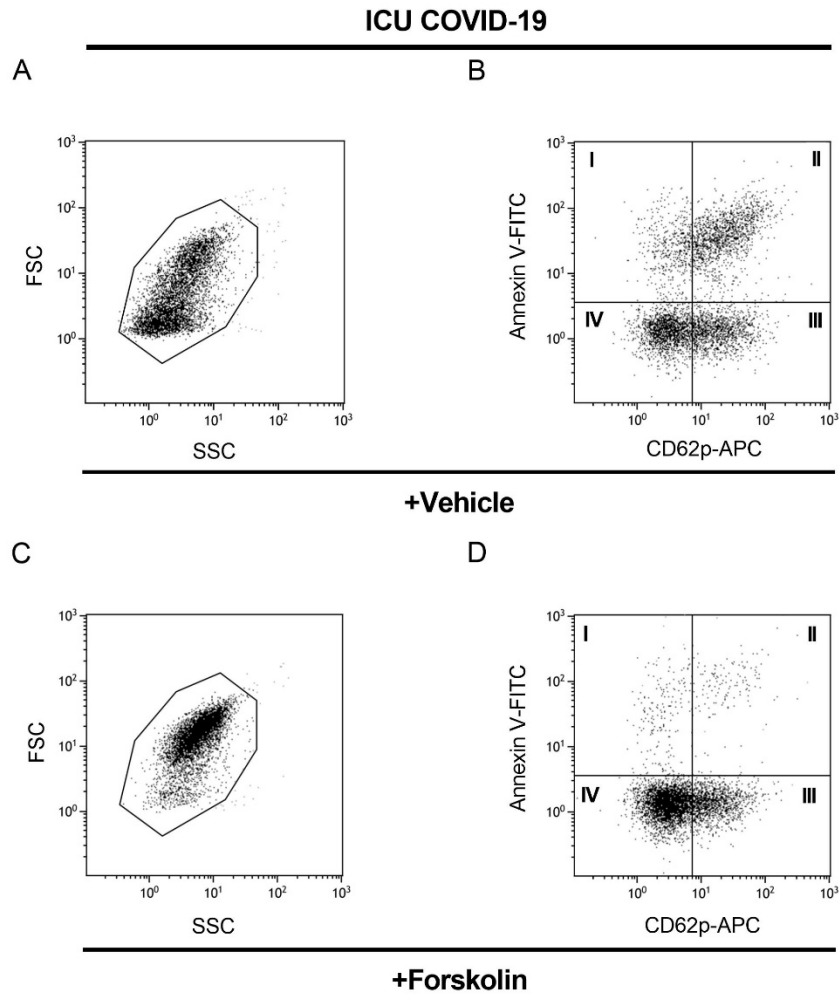

Figure 8.2. I-IV

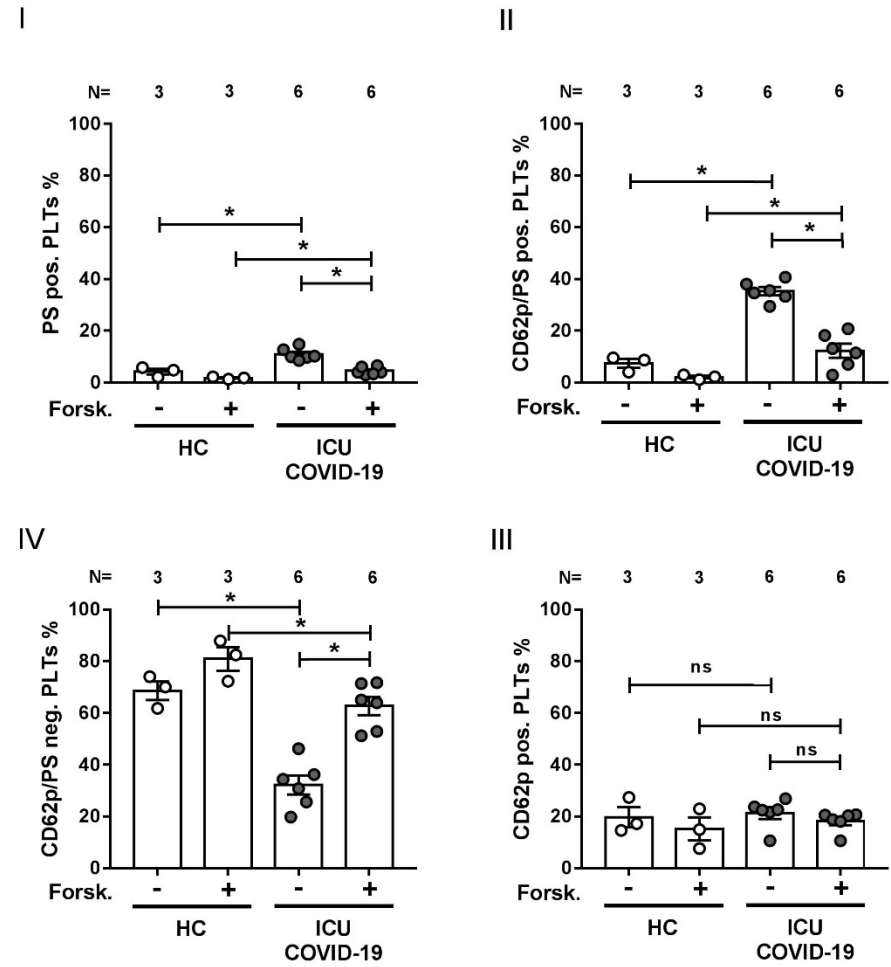

Figure 9.1.

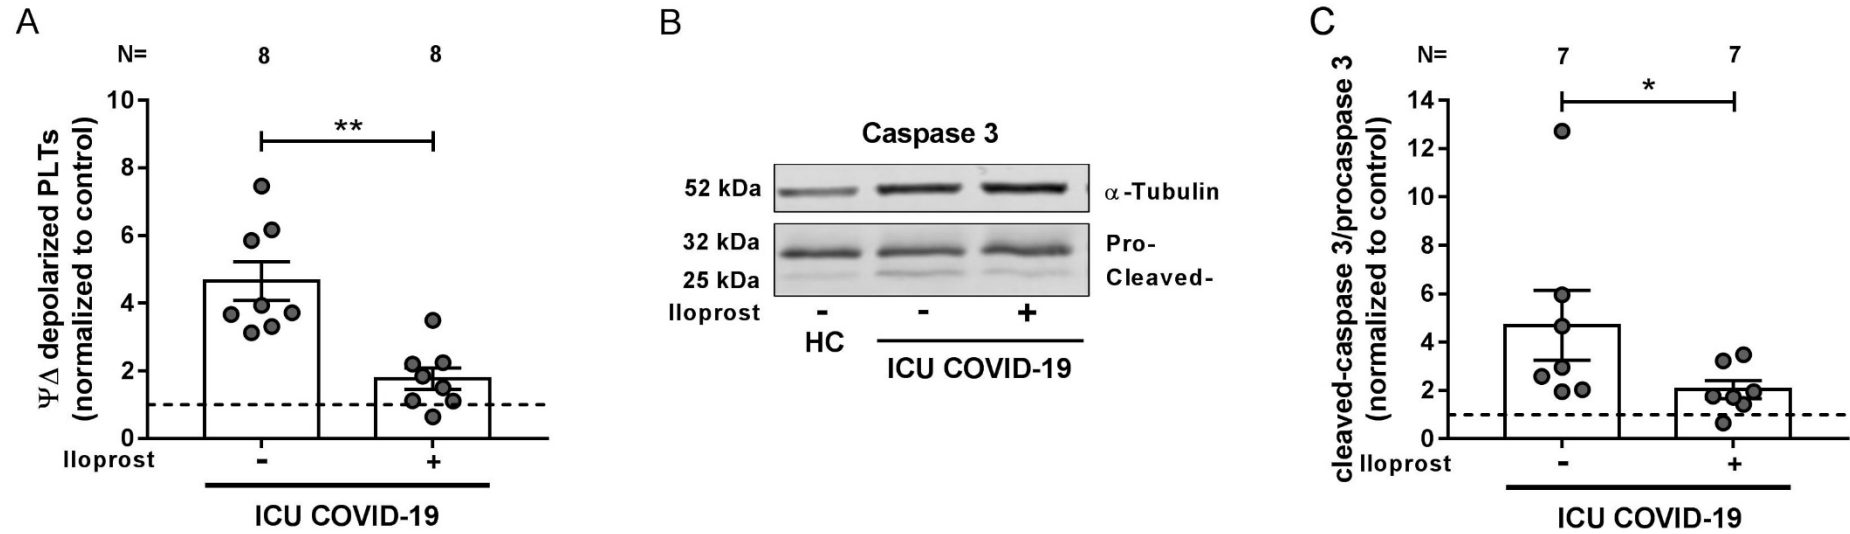



Figure 9.2.

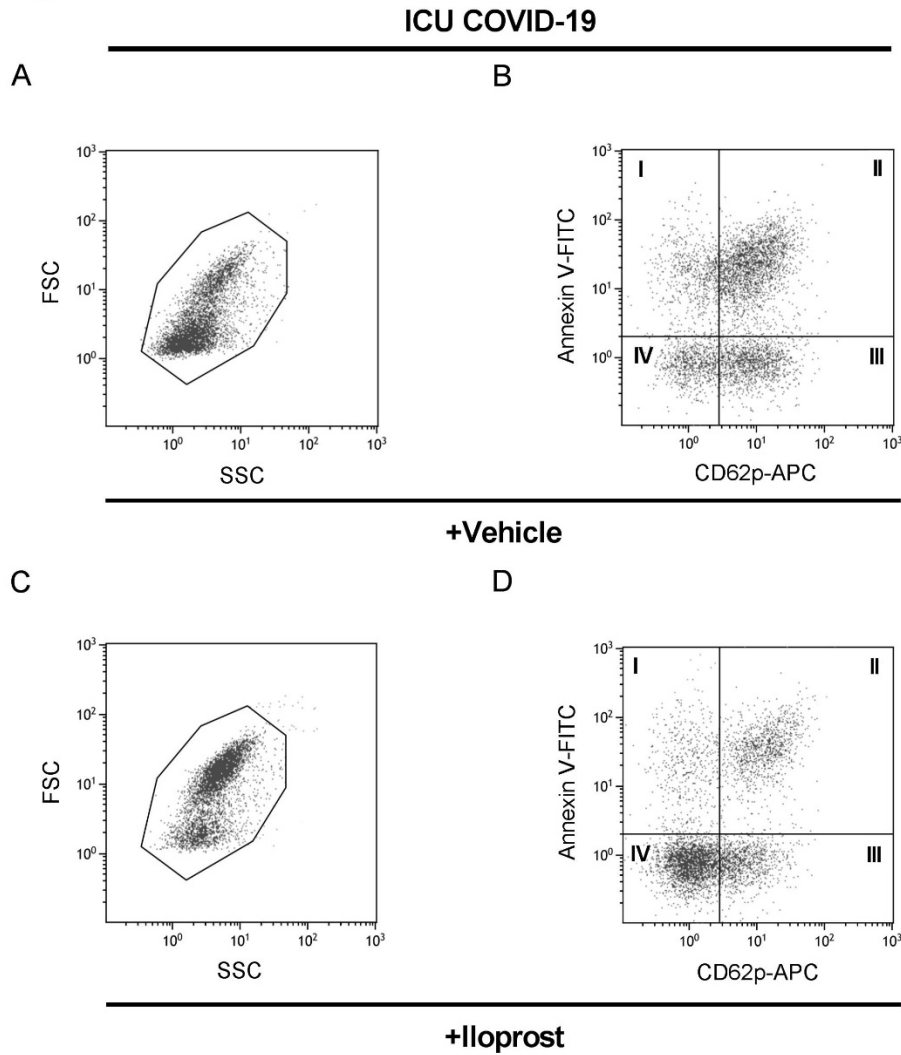

Figure 9.2. I-IV

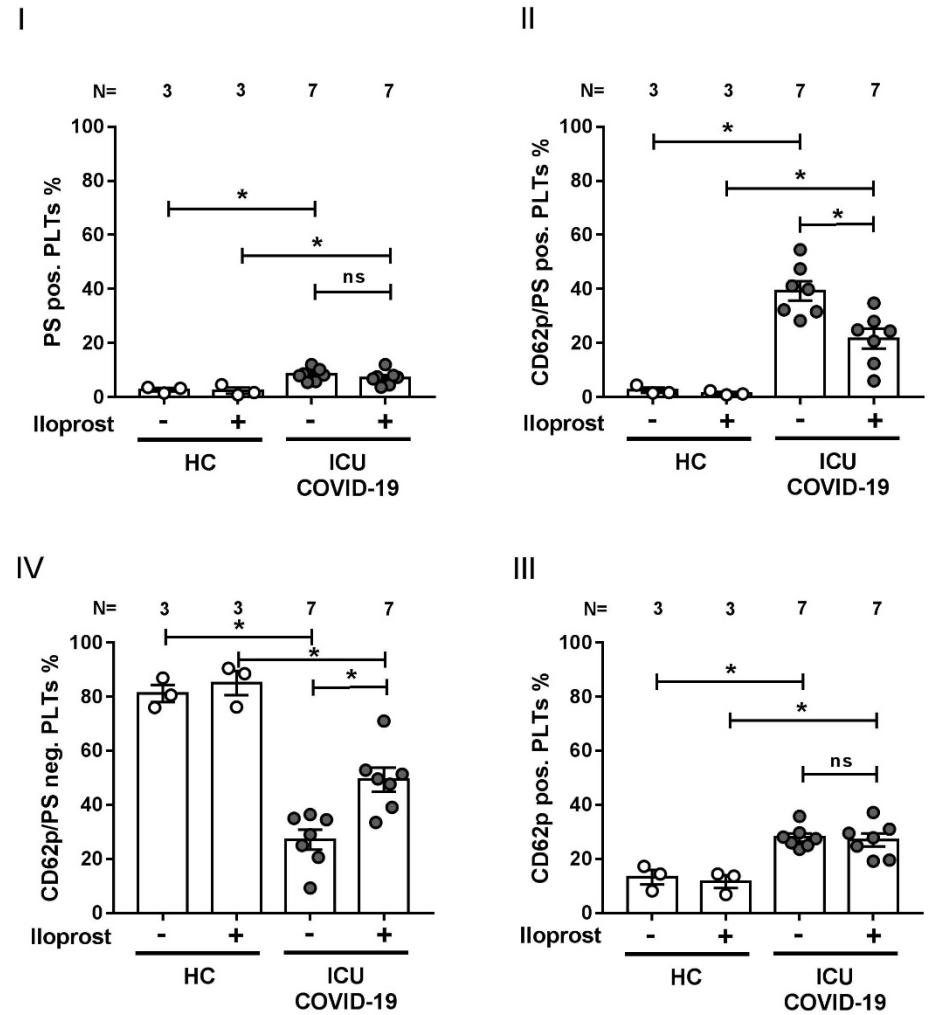

Figure 10

A

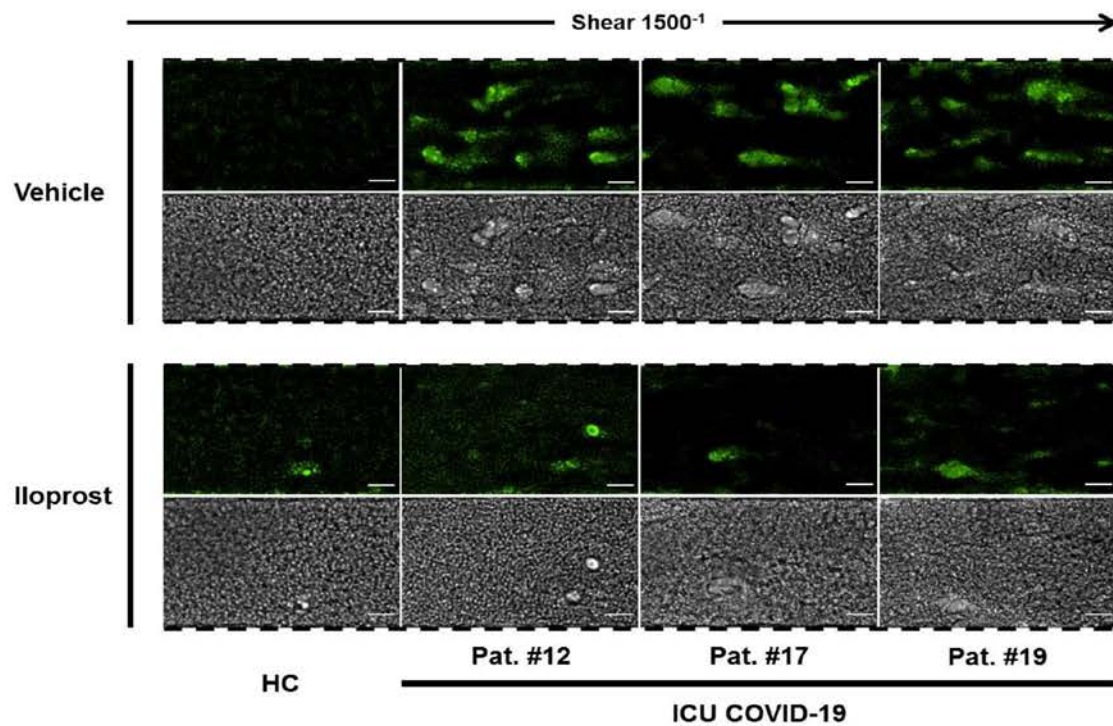

B

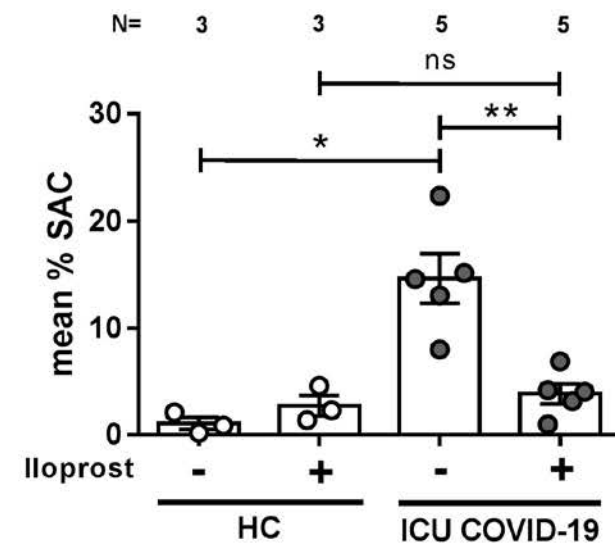

Source: https://medrxiv.org/content/10.1101/2020.12.15.20247775v1.full.pdf
